1 **If this title is funny, will you cite me?**

2 **Citation impacts of humour and other features of article titles in ecology and evolution**

3

4 Stephen B. Heard<sup>1,2</sup>, Chloe A. Cull<sup>1,3</sup>, and Easton R. White<sup>4</sup>

5

6 <sup>1</sup>Dept. of Biology, University of New Brunswick, Fredericton, NB Canada E3B 5A3

7

8 <sup>2</sup>Corresponding author. [sheard@unb.ca](mailto:sheard@unb.ca); Dept. of Biology, University of New Brunswick, PO

9 Box 4400, Fredericton, NB Canada E3B 5A3. Phone: 506-452-6047. FAX: 506-435-

10 3570.

11

12 <sup>3</sup>Current address: Department of Biology, Concordia University, 7141 Sherbrooke Street West,

13 Montreal, QC Canada H4B 1R6

14

15 <sup>4</sup>Department of Biological Sciences, University of New Hampshire, Durham, NH, USA, 03824

16

17 Running Title: *Citation impacts of funny paper titles*

18

19 Statement of authorship: SBH designed the study and led writing. CAC compiled literature and

20 citation counts and contributed to the writing. ERW led data analysis and contributed to the

21 writing.

22 This study was reviewed and approved by the Research Ethics Board of the University of New

23 Brunswick (REB #2020041).

24  
25  
26  
27  
28  
29  
30  
31  
32  
33  
34  
35  
36  
37  
38  
39  
40  
41  
42  
43  
44  
45  
46

## Abstract

Titles of scientific papers play a key role in their discovery, and “good” titles engage and recruit readers. A particularly interesting aspect of title construction is the use of humour, but little is known about whether funny titles boost or limit readership and citation of papers. We used a panel of volunteer scorers to assess title humour for 2,439 papers in ecology and evolution, and measured associations between humour scores and subsequent citation (both self-citation and citation by others). Papers with funnier titles were cited less often, but this appears to result from a confound with paper importance. Self-citation data suggest that authors give funnier titles to papers they consider less important. After correction for this confound, papers with funny titles have significantly *higher* citation rates, suggesting that humour recruits readers. We also examined associations between citation rates and several other features of titles. Inclusion of acronyms and taxonomic names was associated with lower citation rates, while assertive-statement phrasing and presence of colons, question marks, and political regions were associated with somewhat higher citation rates. Title length had no effect on citation. Our results suggest that scientists can use creativity with titles without having their work condemned to obscurity.

## Key Words

humour, titles, scientific writing, citation, research impact

47

48

## Introduction

49

50 Do titles matter? It's easy to find advice about constructing "good" titles for academic  
51 papers (e.g., Thomson and Kamler 2013, Silvia 2014, Saramäki 2018, Belcher 2019, Hofmann  
52 2019, Heard 2022). By "good" titles, we generally agree that we mean those that engage readers  
53 and thus recruit them to a paper. It seems obvious that titles *should* matter in this way: they're  
54 generally the first encounter a potential reader has with a paper, and they're much more widely  
55 (and easily) communicated than papers themselves. Belcher (2019), for example, recommends  
56 titles that aren't too broad, avoid abstract terms, name specific research subjects (such as species  
57 or places), include searchable keywords and verbs, and avoid cleverness or wit – among other  
58 things. There isn't strong agreement, though, with advice from other sources sometimes  
59 concurring with Belcher's and sometimes contradicting it. Moreover, it's rare for advice of this  
60 sort to be supported by data.

61 The availability of large citation-rate datasets has made possible correlative analysis of at  
62 least one possible consequence of "good" titles: if a good title attracts readership, it should also  
63 make it more likely that the paper is cited. Conversely, papers whose bad titles repel, or at least  
64 fail to engage, readers are less likely to be cited. So what, empirically, makes a good title? The  
65 literature promises much, but delivers relatively little. For most easily-scored features of article  
66 titles, measured effects are weak (e.g., Costello et al. 2019) and inconsistent both among and  
67 within disciplines. As an example, consider title length. Most advice favours short titles, but also  
68 titles that clearly communicate an article's contents (the fundamental contradiction between  
69 those suggestions is hard to miss). While most studies find short titles to have higher citation

70 rates, a few have found the opposite, some find no association at all, and still others find  
71 associations that shift across disciplines (review: Heard 2021). In almost every study, though,  
72 title length explains only a small fraction of variation in citation rates. The literature for other  
73 title features (such as the use of question marks, colons, and hyphens and the inclusion of  
74 geographic place names) is similarly mixed. About the only title feature on which the literature is  
75 consistent is that titles including scientific names of genera or species are less cited than those  
76 that do not (Fox and Burns 2015, Yuret 2018, Murphy et al 2019). The picture that emerges from  
77 this work is that many features of titles are indeed associated with differences in citation rate –  
78 but that most associations are weak, and many are inconsistent. And yet it’s difficult to imagine  
79 that titles really don’t matter.

80         A major gap in our knowledge involves humour. Do funny titles attract reader attention,  
81 and thus increase impact? Or do they suggest that readers shouldn’t take the work seriously, and  
82 thus decrease impact? Some writing guides explicitly advise against the use of humour in titles  
83 (e.g., Thomson and Kamler 2013:85, Mack 2018:47, Belcher 2019:288). However, just three  
84 papers to our knowledge have attempted to put evidence behind this advice – likely because  
85 humour resists the kind of automated scoring that makes other features of titles easy to study.  
86 Sagi and Yechiam (2008) used panels of undergraduates to assess humour in titles of psychology  
87 papers, and found that the funniest titles were cited (slightly) less. Perhaps, they reasoned, this is  
88 because “scientific publication is considered a serious matter, and humor seems antithetical to  
89 it”. Subotic and Mukherjee (2014) attempted to replicate Sagi and Yechiam’s result (again for  
90 psychology papers), but instead found a positive effect of humour on downloads but no effect on  
91 citations. Finally, Murphy et al. (2019) found no significant effect of title humour on citation rate  
92 for ecology and entomology papers. Two other studies have examined related attributes of titles:

93 Haslam et al. (2008) found no effect on citation of “catchiness” (a title could be catchy because it  
94 was funny, or for many other reasons); and Keating et al. (2019) found a negative effect of title  
95 sarcasm. And yet funny titles (and the papers that bear them) are widely shared on social media  
96 and stick in memory. This incongruity suggests that humour in scientific titles deserves further  
97 study, including of the possibility that humour in titles may be correlated with other aspects of  
98 papers that influence their later citation.

99 We used citation rate data for 2,439 papers in ecology and evolution, taken from nine  
100 leading journals, to ask whether humour in titles influences subsequent impact. We used self-  
101 citation data to control for possible effects of underlying differences in paper importance. We  
102 also considered two features of titles that are closely related to humour: cultural references or of  
103 titles that could be considered offensive. Finally, we consider possible effects of a variety of  
104 other title features, including length, use of colons and questions, and inclusion of taxonomic and  
105 geographic names. Effects on citation rates were mostly subtle, but we present evidence that,  
106 after controlling for paper importance, funny titles increase impact. We regret, therefore, being  
107 unable to think of a funnier title for this paper.

108

109

## 110 **Methods**

111

### 112 *Compiling papers*

113 We compiled the titles for every paper published in 2000 and 2001 in nine well-known  
114 ecology and evolution journals: *The American Naturalist*, *Ecology*, *Evolution*, *Evolutionary*  
115 *Ecology*, *Journal of Animal Ecology*, *Journal of Ecology*, *Journal of Evolutionary Biology*,

116 *Oikos*, and *Trends in Ecology and Evolution*. Our compilation included 2,439 papers. We  
117 categorized papers as primary research articles, review articles, and “other”, with that last  
118 category including less standard forms such as “forum review” articles (*Oikos*) and “journal  
119 club” articles (*Trends in Ecology and Evolution*).

120

### 121 *Scoring titles*

122 We recorded whether each paper’s title was a question or an assertive sentence (a  
123 declarative statement of a main result), and whether it was a two-part title (using a colon, dash,  
124 etc.). We also scored titles (yes/no) for the presence of acronyms or initialisms, for the inclusion  
125 of the scientific (Latin) name of a genus or species, and for the mention of a political region  
126 (country, state/province, etc.). We then assembled a group of 11 “humour scorers”, who received  
127 a spreadsheet of titles and were asked to score them for humour, offensiveness, and the presence  
128 of cultural references (allusions to books, movies, music, memes, and other non-scientific  
129 cultural knowledge). Journal names and author lists were redacted from the spreadsheets sent to  
130 humour scorers, and they were instructed not to look up any information about a paper beyond  
131 its title. Each scorer received the full set of 2,439 titles, but in a different random order. We  
132 instructed scorers to work in 20 minute sessions to avoid task fatigue, not to score more than 8  
133 20-minute sessions in a day, and to score each title with their screen adjusted so that only that  
134 title was visible. Scorers were students or employees of the University of New Brunswick,  
135 Fredericton, New Brunswick, Canada. All scorers gave informed consent before their  
136 involvement, and the study was reviewed and approved by the Research Ethics Board of the  
137 University of New Brunswick (REB #2020041).

138           We had scorers assess humour on a 7-point scale, from zero (completely serious) to 6  
139 (extremely funny). We did not attempt to calibrate scales across scorers. Scorers were asked to  
140 infer the author’s attempt at humour, rather than their own assessment of how funny the title was,  
141 and they were asked to ignore the subject of the article in assessing humour.

142           We asked scorers to identify any titles they found offensive. In contrast to the humour  
143 scoring, here we asked scorers to report their own feelings rather than their inference about the  
144 authors’ intent. Also in contrast to humour scoring, we allowed for a title to be found offensive  
145 as a result of the article’s subject (for example, a scorer might be offended by the use of humour  
146 in the title of an article addressing a very serious subject).

147           We asked scorers to identify titles that included cultural references of any sort (books,  
148 movies, music, memes, etc.). In a few cases, scorers reported that they suspected a cultural  
149 reference but could not identify its origin; we instructed them to include these instances. We did  
150 not restrict the age of a “cultural reference”. Thus, allusions to Vivaldi and Lil Nas X are both  
151 cultural references and are treated equally in our analyses. We acknowledge, however, that  
152 scorers might sometimes miss less current examples.

153

#### 154 *Tracking citations*

155           Because a minority of titles included humour or cultural references, we subset the titles  
156 database before gathering citation data. We first identified all titles for which at least one scorer  
157 recorded either a non-zero humour score or a cultural reference. There were 414 such titles, and  
158 all underwent citation tracking. From the remaining 2,025 titles, we randomly selected 650 for  
159 tracking, giving us a citation-tracked dataset of 1,064 titles. We randomized the order of titles  
160 before counting citations, because citations accumulate through time. We used Scopus™ to

161 count citations, recording the total number of citations from publication until the date of  
162 checking. We divided total citations into self- and other-citation. Self-citations were citations of  
163 the focal paper by any paper that shared at least one author; other-citations were citations of the  
164 focal paper by any paper with a non-overlapping set of authors. We use self-citations as an  
165 indicator of a paper's intrinsic importance, reasoning that the authors' likelihood of later citing  
166 their own paper depends on its content, not on its title.

167

168 *Data analysis*

169

170 We compared citation rates and humour scores among paper types using generalized  
171 linear models with Poisson (citation counts) or Gaussian (humour scores) error terms. We  
172 measured agreement among humour scorers by calculating pairwise Pearson correlation  
173 coefficients among scorers and calculating Light's (1971) kappa as an overall measure of  
174 concordance. Light's kappa is the mean of all possible pairwise combinations of kappa scores  
175 between raters, where each  $\kappa = (P(a) - P(e)) / (1 - P(e))$ . In this expression,  $P(a)$  is the observed  
176 fraction of agreement and  $P(e)$  is the expected fraction of agreement due to chance.

177 We assessed the effect of various title attributes on both total citation count and self-  
178 citation count using a series of generalized linear models, each with a Poisson error structure.  
179 Specifically, we examined the effect of article type (PrimaryReviewOther), whether the title was  
180 phrased as a question (Question), whether the title was assertive (Assertive), the presence of a  
181 colon or dash in the title (Colon), the presence of any acronyms or initialisms (Acronyms),  
182 whether the political region was noted in the title (Location), the presence of a taxonomic name  
183 (Taxonomic\_name), and the average humour, offensiveness, and cultural-reference scores for



184 each title (Avg\_humour, Avg\_offense, Avg\_culture). For humour, we also calculated an  
185 importance-corrected citation rate as total citations divided by self citations, and tested a similar  
186 generalized linear model. We use this test primarily as a way of illustrating the importance  
187 effect, recognizing that it is not independent of the separate total- and self-citation tests. We  
188 assessed each combination of these predictor variables and ranked models according to AIC  
189 criteria – once for an analysis including all article types, and then again considering only primary  
190 research articles. We present only the best fitting model for each response variable. We did not  
191 include highly-correlated ( $>0.7$ ) predictor variables in the same model, and we did not include  
192 offensiveness or cultural-reference scores as these are conceptually related to, and correlated  
193 with, humour. We examined residual plots to verify that model assumptions were met. Unless  
194 otherwise specified, for all reported results  $P < 0.01$ .

195

## 196 **Results**

197

198 Citation counts for the papers we tracked were extremely variable, ranging from zero to  
199 just over 2,300. Unsurprisingly, review papers were cited more heavily, on average, than primary  
200 research papers; “other” papers had the lowest citation rates (Figure 1A). The citation advantage  
201 of review papers was far smaller, but still significant, for self-citation (Figure 1B). Among article  
202 types, titles from “other” papers were rated significantly more humorous than those from review  
203 and primary articles (Figure 1C). Humour did not vary significantly among journals, except that  
204 *Trends in Ecology and Evolution* (where all papers belonged to the review or “other” types) had  
205 significantly funnier titles than the rest (Figure 1D). Our best fitting models and parameter  
206 estimates were similar whether we analyzed all articles or just primary research papers (compare

207 Tables 1 and 2, for all articles, with Supplementary Materials, Tables S1 and S2, for primary  
208 research papers only). In what follows, we present only the more comprehensive analysis.

209 Few titles were funny: only 414 of 2,439 papers were assigned a non-zero humour score  
210 by even one scorer, and only 60 had at least 11 humour points (as they would if all scorers gave  
211 them the minimum non-zero humour score, or two scorers gave them the maximum score). We  
212 saw fairly low, but non-zero, agreement among scorers in their assessment of title humour. The  
213 overall concordance score (Light's kappa) was just 0.34; most pairwise correlations had  $r < 0.5$ ,  
214 and many had  $r < 0.3$  (Figure 2).

215 Our best-performing models suggested contributions to citation rate from title humour  
216 but also from phrasing titles as questions, including colons, acronyms, locations, and taxonomic  
217 names, and (for all article types but not for primary research papers alone) phrasing titles as  
218 assertive statements. However, some of these effects were weak.

219 After we controlled for other predictors, total citations declined with average title humour  
220 (Figure 3A). The effect was relatively small, with a decrease of 4% in total citations for each 1  
221 point increase in average humour score, but this equates to a difference of 20.4% between the  
222 least and most humorous titles. There is, however, an important qualification: the pattern was  
223 similar, but much stronger, for self citations, with an 82% decrease for the most humorous titles  
224 (Figure 3B). Thus, after correcting for underlying paper importance, funny title are cited more,  
225 not less (Figure 3C), with a 23% increase for each 1 point increase in humour score.

226 While we did not include offensiveness or cultural references in our AIC modeling, we  
227 examined their association with citation rates in isolation. Offensive titles were rare, with only 19  
228 of 2,439 titles scored as offensive by even a single scorer. Citation rates declined with average  
229 offense score (Figure 4A). However, as for humour, there was an even stronger decline for self-

230 citations (Figure 4B), suggesting that less important papers are given titles that our scorers  
231 judged offensive. Titles including cultural references show a pattern of increasing citation  
232 (Figure 4C), despite fewer self-citations (Figure 4D, again suggesting lower underlying paper  
233 importance). Interestingly, the detection of cultural references by our scorers was quite  
234 imperfect: most titles received scores below 0.5, meaning that half or fewer of our scorers  
235 noticed the presence of a reference.

236         Several other characteristics of paper titles were significant predictors of citation counts  
237 in the AIC model, but most of these effects were relatively weak. Titles with colons or question  
238 marks, those phrased as assertive statements, and those including names of political regions were  
239 more highly cited (Table 1 and Supplementary Material Figure S1, upper row), although only the  
240 colon effect was strong and the “assertive statement” effect disappeared when we analyzed only  
241 primary research articles; Supplementary Material Table S1). Effects on self-citation were  
242 mostly very weak (Supplementary Material Figure S1, lower row), except that titles mentioning  
243 political regions had moderately more self-citations. Finally, title length was excluded from all  
244 AIC models (Tables 1, 2) and made little difference to either total or self citation rates viewed in  
245 isolation (Supplementary Materials Figure S2).

246         We found stronger effects for the inclusion in titles of acronyms and taxonomic names.  
247 Each was associated with a sharp decrease in citation rates (acronyms 41%, Figure 5A; and  
248 taxonomic names 32%, Figure 5C). These effects cannot be explained by paper importance, as  
249 the inclusion of acronyms was not associated with self-citation (Figure 5B) and the inclusion of  
250 taxonomic names was associated with slightly higher self-citation (Figure 5D).

251

252

253 **Discussion**

254

255 Despite the widespread availability of clear and firm advice on constructing “good” titles,  
256 the most striking pattern we document is simply that few easily measured attributes of titles seem  
257 to have strong associations with citation rates. This is broadly consistent with the literature (e.g.,  
258 Costello et al. 2019, Murphy et al. 2019; review: Heard 2021).

259 There were some differences in humour scores among the three article types we  
260 distinguished. In particular, “other” articles (forum review and journal club papers) had both the  
261 highest humour scores and the lowest citation rates. This can account for the higher average  
262 humour scores for one journal (*Trends in Ecology and Evolution*), where the bulk of “other”  
263 papers were published. Otherwise, though, article type didn’t drive the patterns in citation rate  
264 we observed, as analyses restricted to primary research articles had very similar results to those  
265 including all three article types.

266 Our analysis suggests that humour in the title can increase a paper’s impact. It is true that  
267 the simplest analysis, correlating total citations with humour score, finds a (weak) negative  
268 relationship. However, such an analysis fails to account for the possibility that authors are less  
269 likely to use humour in titling their more important papers. Our self-citation data strongly  
270 suggest that this is true: papers with funnier titles are subsequently cited less *by their own*  
271 *authors*. Since authors don’t need titles to alert them to their own papers, self-citation provides a  
272 title-independent estimator of importance – unlike other-citations, for which effects of title and  
273 underlying importance on citation are inextricably confounded. Because the decline in self-  
274 citation with humour score is much steeper for self-citations than for other-citations, funny titles  
275 are actually over-cited, not under-cited, after correction for paper importance (Figure 3C).

276 Earlier literature has not considered the possibility of confounding between title humour  
277 and paper importance. An analysis for psychology papers by Sagi and Yechiam (2008), which  
278 found a negative association between total citations and title humour, did not attempt any  
279 correction for paper importance, via self-citation or otherwise. As a result, that analysis may well  
280 have drawn precisely the wrong conclusion. The same issue applies to analyses by Subotic and  
281 Mukherjee (2014) and Murphy et al. (2019), both of which found no effect of humour on total  
282 citation but, again, did not correct for paper importance. Advice to avoid humour in paper titles  
283 (e.g., Thomson and Kamler 2013:85, Mack 2018:47, Belcher 2019:288) is thus not well founded  
284 in evidence – at least, not if the concern is citation impact.

285 Scientists sometimes express two related worries about the use of humour: that funny  
286 titles might be seen as offensive, and that funny titles will be misunderstood by those who don't  
287 share the author's cultural background. Our data suggest three things about this. First, if these  
288 things happen, they don't affect citation much. Papers with titles identified as offensive were  
289 indeed cited less, but as for humour, analysis of self citations suggests that this can be more than  
290 explained by the use of such titles for less important papers. Second, the low concordance among  
291 our scorers suggest that even with a group of scorers of relatively homogeneous cultural  
292 background, opinions about humour and offense vary widely. The simultaneous existence of  
293 *South Park* and *The Satanic Verses* should make it obvious that both humour and offense are  
294 deeply personal, and both will sometimes be perceived even when neither is intended. Third,  
295 even though some readers will miss cultural references in titles (it was commonplace for our  
296 scorers to differ in their detection), this does not interfere with discovery or impact of the papers:  
297 the use of cultural references was strongly associated with increased citation rates.

298 Other features of titles are significantly associated with citation rates, but most of the  
299 effect sizes are small – as has generally been true in previous studies. Citation rates are higher for  
300 two-part titles (those with colons, dashes, etc.) and a little higher for question and assertive  
301 sentence titles. Inclusion of a geographic region name increases citation a little, consistent with  
302 some other studies (Rostami et al. 2013, Nair and Gibbert 2015, Murphy et al. 2019) but  
303 contrasting with others (Jacques and Sebire 2010, Paiva et al. 2012, Abramo et al. 2016,  
304 Alimoradi et al. 2016, Yuret 2018, Costello et al. 2019). However, analysis of self citation  
305 suggests that this is likely explained by a tendency for authors to use geographic names in their  
306 more important papers. We do not have an explanation for this tendency, which surprised us.  
307 Title length, which is one of the most frequent targets of well-meaning advice, had virtually no  
308 effect on citation. This is broadly consistent with the literature (review: Heard 2021): shorter  
309 titles are sometimes found to be cited more, and sometimes found to be cited less, but the effects  
310 vary from weak to very weak. Keeping titles short may help typesetters, but seems to have no  
311 implication for authors or readers.

312 There were larger effects for taxonomic names: their inclusion is associated with a steep  
313 (32%) reduction in citation. The negative effect of taxonomic names in titles is one of the few  
314 citation effects to be consistent across studies (Fox and Burns 2015, Yuret 2018, Murphy et al.  
315 2019). Readers appear to behave as if inclusion of a taxonomic name signals narrower scope of,  
316 and thus narrower interest in, a paper. This could be a reliable signal (papers including  
317 taxonomic names may, on average, genuinely be of narrower scope) or a misperceived one (with  
318 readers being deterred from papers that really are relevant to them). Since *self*-citations don't  
319 decline with the inclusion of a taxonomic name, we suspect that misperception is often involved.  
320 Authors may therefore wish to consider removing scientific names of taxa from titles.

321           Finally, we were surprised by the strong pattern for acronyms. Despite our deep  
322 familiarity with – perhaps even love for – acronyms (Barnett and Doubleday 2020), their  
323 appearance in a title is associated with a 41% decrease in citation rates, and this can't be  
324 explained by variation in paper importance. There were already good reasons to reduce our use  
325 of acronyms in writing; their apparent effect on citation impact may add another.

326           There is, of course, an important assumption behind our choice of citation rate as a  
327 variable to correlate with features of titles. Citation rate is only of interest if it says something  
328 useful about the reach or impact of a paper. Given that science is a fundamentally cumulative  
329 process, and given that modern citation practices involve an ethical responsibility to cite  
330 influential work, citation rate really does seem likely to be measuring something useful. In a few  
331 cases, of course, a paper may be heavily cited because it's wrong – for example, as an example  
332 of how an analysis can go astray – but we doubt that such citations account for a significant  
333 fraction of our database.

334           Ultimately, the factors that explain the citation impact of a paper are sure to be numerous,  
335 interrelated in complex fashion, and extending far beyond just the title. However, because titles  
336 are the first point of contact with a paper for most readers, we suspect interest in their  
337 construction will remain strong. In a sense, our results are mostly good news for authors: few  
338 title features (barring acronyms and taxonomic names) work against citation. That means  
339 scientists can use titles creatively, even inserting touches of humour (Heard 2014), without fear  
340 of their work ending up in undeserved obscurity.

341

342

343

344  
345  
346  
347  
348  
349  
350  
351  
352

### **Acknowledgements**

We thank our scorers, who read more paper titles in a couple of weeks than some people do in a career. Lyndsey Burrell grappled bravely and well with searching and summarizing a rather peculiar literature. We are grateful to members of the PEER Group, Dept. of Biology, University of New Brunswick, for helpful comments on the work. This research was funded by the Natural Sciences and Engineering Research Council of Canada via a Discovery Grant to SBH.



353 **References**

- 354 Abramo, G., D'Angelo, C.A., Di Costa, F., 2016. The effect of a country's name in the title of a  
355 publication on its visibility and citability. *Scientometrics* 109, 1895–1909.  
356 <https://doi.org/10.1007/s11192-016-2120-1>
- 357 Alimoradi, F., Javadi, M., Mohammadpooras, A., Moulodi, F., Hajizadeh, M., 2016. The effect  
358 of key characteristics of the title and morphological features of published articles on their  
359 citation rates. *Annals of Library and Information Studies* 63, 74–77.
- 360 Barnett, A., Doubleday, Z., 2020. The growth of acronyms in the scientific literature. *eLife* 9.  
361 <https://doi.org/10.7554/eLife.60080>
- 362 Belcher, W., 2019. *Writing Your Journal Article in Twelve Weeks, Second Edition: A Guide to*  
363 *Academic Publishing Success*, 2nd ed. Sage Publications.
- 364 Costello, M.J., Beard, K.H., Primack, R.B., Devictor, V., Bates, A.E., 2019. Are killer bees good  
365 for coffee? The contribution of a paper's title and other factors to its future citations.  
366 *Biological Conservation* 229, A1–A5. <https://doi.org/10.1016/j.biocon.2018.07.010>
- 367 Fox, C.W., Burns, C.S., 2015. The relationship between manuscript title structure and success:  
368 Editorial decisions and citation performance for an ecological journal. *Ecology and*  
369 *Evolution* 5, 1970–1980. <https://doi.org/10.1002/ece3.1480>
- 370 Haslam, N., Ban, L., Kaufmann, L., Loughnan, S., Peters, K., Whelan, J., Wilson, S., 2008. What  
371 makes an article influential? Predicting impact in social and personality psychology.  
372 *Scientometrics* 76, 169–185. <https://doi.org/10.1007/s11192-007-1892-8>
- 373 Heard, S., 2014. On whimsy, jokes, and beauty: can scientific writing be enjoyed? *Ideas in*  
374 *Ecology and Evolution* 7, 64–72. <https://doi.org/10.4033/iee.2014.7.14.f>

- 375 Heard, S.B., 2022. The Scientist's Guide to Writing, 2nd Edition: How to Write More Easily and  
376 Effectively throughout Your Scientific Career, 2nd ed. Princeton University Press.
- 377 Heard, S.B., 2021. Strong opinions, weak effects: What makes a good title? Blog post, Scientist  
378 Sees Squirrel, March 23, 2021  
379 [https://scientistseesquirrel.wordpress.com/2021/03/23/strong-opinions-weak-effects-](https://scientistseesquirrel.wordpress.com/2021/03/23/strong-opinions-weak-effects-what-makes-a-good-title/)  
380 [what-makes-a-good-title/](https://scientistseesquirrel.wordpress.com/2021/03/23/strong-opinions-weak-effects-what-makes-a-good-title/)
- 381 Hofmann, A., 2019. Scientific Writing and Communication: Papers, Proposals, and  
382 Presentations, 4th ed. Oxford University Press.
- 383 Jacques, T.S., Sebire, N.J., 2010. The impact of article titles on citation hits: an analysis of  
384 general and specialist medical journals. JRSM Short Rep 1, 2.  
385 <https://doi.org/10.1258/shorts.2009.100020>
- 386 Keating, D.M., Richards, A.S., Palomares, N.A., Banas, J.A., Joyce, N., Rains, S.A., 2019.  
387 Titling Practices and Their Implications in Communication Research 1970-2010: Cutesy  
388 Cues Carry Citation Consequences1. Communication Research.  
389 <https://doi.org/10.1177/0093650219887025>
- 390 Light, R.J., 1971. Measures of response agreement for qualitative data: Some generalizations and  
391 alternatives. Psychological Bulletin 76, 365–377. <https://doi.org/10.1037/h0031643>
- 392 Mack, C., 2018. How to Write a Good Scientific Paper, 1st ed. SPIE.
- 393 Murphy, S.M., Vidal, M.C., Hallagan, C.J., Broder, E.D., Barnes, E.E., Horna Lowell, E.S.,  
394 Wilson, J.D., 2019. Does this title bug (Hemiptera) you? How to write a title that  
395 increases your citations. Ecological Entomology 44, 593–600.  
396 <https://doi.org/10.1111/een.12740>

- 397 Nair, L.B., Gibbert, M., 2016. What makes a ‘good’ title and (how) does it matter for citations?  
398 A review and general model of article title attributes in management science.  
399 *Scientometrics* 107, 1331–1359. <https://doi.org/10.1007/s11192-016-1937-y>
- 400 Paiva, C.E., Lima, J.P.S.N., Paiva, B.S.R., 2012. Articles with short titles describing the results  
401 are cited more often. *Clinics* 67, 509–513. [https://doi.org/10.6061/clinics/2012\(05\)17](https://doi.org/10.6061/clinics/2012(05)17)
- 402 Rostami, F., Mohammadpoorasl, A., Hajizadeh, M., 2014. The effect of characteristics of title on  
403 citation rates of articles. *Scientometrics* 98, 2007–2010. [https://doi.org/10.1007/s11192-](https://doi.org/10.1007/s11192-013-1118-1)  
404 [013-1118-1](https://doi.org/10.1007/s11192-013-1118-1)
- 405 Sagi, I., Yechiam, E., 2008. Amusing titles in scientific journals and article citation. *Journal of*  
406 *Information Science* 34, 680–687. <https://doi.org/10.1177/0165551507086261>
- 407 Saramäki, J., 2018. *How to Write a Scientific Paper: An Academic Self-Help Guide for PhD*  
408 *Students*, 1st ed. Independently Published.
- 409 Silvia, P., 2014. *Write It Up: Practical Strategies for Writing and Publishing Journal Articles*, 1st  
410 ed. American Psychological Association (APA).
- 411 Subotic, S., Mukherjee, B., 2014. Short and amusing: The relationship between title  
412 characteristics, downloads, and citations in psychology articles. *Journal of Information*  
413 *Science* 40, 115–124. <https://doi.org/10.1177/0165551513511393>
- 414 Thomson, P., Kamler, B., 2013. *Writing for Peer Reviewed Journals*, 1st ed. Routledge.
- 415 Yuret, T., 2018. Citation performance of publications grouped by keywords, titles, and abstracts.  
416 *Data and Information Management* 2, 83–90. <https://doi.org/10.2478/dim-2018-0006>  
417  
418  
419

420 **Figure and Table Legends**

421

422 Table 1. Best fitting model after AIC model selection for total citations.

423

424 Table 2. Best fitting model after AIC model selection for self-citations.

425

426 Figure 1. Total citations (A) and self citations (B) compared among article types (Other,  
427 Primary, or Review); and average humour scores compared among article types (C) and  
428 among journals (D).

429

430 Figure 2: Concordance among scorers for title humour. The matrix shows Pearson correlation  
431 coefficient ( $r$ ) for each pairwise combination of scorers, across all scored titles. The  
432 overall concordance, measured by Light's kappa, was 0.34.

433

434 Figure 3: Humour and citation rates. Both total citations (A) and self citations (B) significantly  
435 decreased with higher humour scores. However, the effect size is much larger for self  
436 citations, and the ratio of total to self (C) citations *increases* with humour score.

437

438 Figure 4: Offensive titles, cultural references, and citation rates. Total citations decreased  
439 significantly with higher offensive scores (A), but self citations decreased more strongly  
440 (B). The inclusion of cultural references was associated with higher total citations (C) but  
441 with *lower* self citations (D).

442

443 Figure 5: Acronyms, taxonomic names, and citation rates. The inclusion of acronyms was  
444 associated with a significant decrease in total citations (A), but was not associated with  
445 self citations (B). The inclusion of taxonomic names was associated with a strong  
446 decrease in total citations (C) but a slight increase in self citations (D).  
447

448 Table 1: Best fitting model after AIC model selection for total citations.

|                           | <i>Dependent variable:</i>  |
|---------------------------|-----------------------------|
|                           | Total_citations             |
| PrimaryReviewOtherPrimary | 0.542***<br>(0.013)         |
| PrimaryReviewOtherReview  | 1.662***<br>(0.014)         |
| QuestionY                 | 0.044***<br>(0.009)         |
| AssertiveY                | 0.165***<br>(0.011)         |
| ColonY                    | 0.416***<br>(0.006)         |
| AcronymsY                 | -0.529***<br>(0.052)        |
| LocationY                 | 0.082***<br>(0.011)         |
| Taxonomic_nameY           | -0.389***<br>(0.010)        |
| avg_humour                | -0.096***<br>(0.006)        |
| Constant                  | 3.926***<br>(0.013)         |
| Observations              | 1,027                       |
| Log Likelihood            | -61,416.010                 |
| Akaike Inf. Crit.         | 122,852.000                 |
| Note:                     | *p<0.1; **p<0.05; ***p<0.01 |

449

450

451

452 Table 2: Best fitting model after AIC model selection for self-citations.

|                           | <i>Dependent variable:</i>  |
|---------------------------|-----------------------------|
|                           | Self_citations              |
| PrimaryReviewOtherPrimary | 1.125***<br>(0.057)         |
| PrimaryReviewOtherReview  | 1.327***<br>(0.064)         |
| QuestionY                 | -0.076**                    |
| ColonY                    | (0.035)                     |
| LocationY                 | 0.126***<br>(0.021)         |
| avg_humour                | 0.248***                    |
| Constant                  | (0.034)                     |
|                           | -0.152***<br>(0.027)        |
|                           | 1.109***<br>(0.057)         |
| Observations              | 1,027                       |
| Log Likelihood            | -6,062.415                  |
| Akaike Inf. Crit.         | 12,138.830                  |
| Note:                     | *p<0.1; **p<0.05; ***p<0.01 |

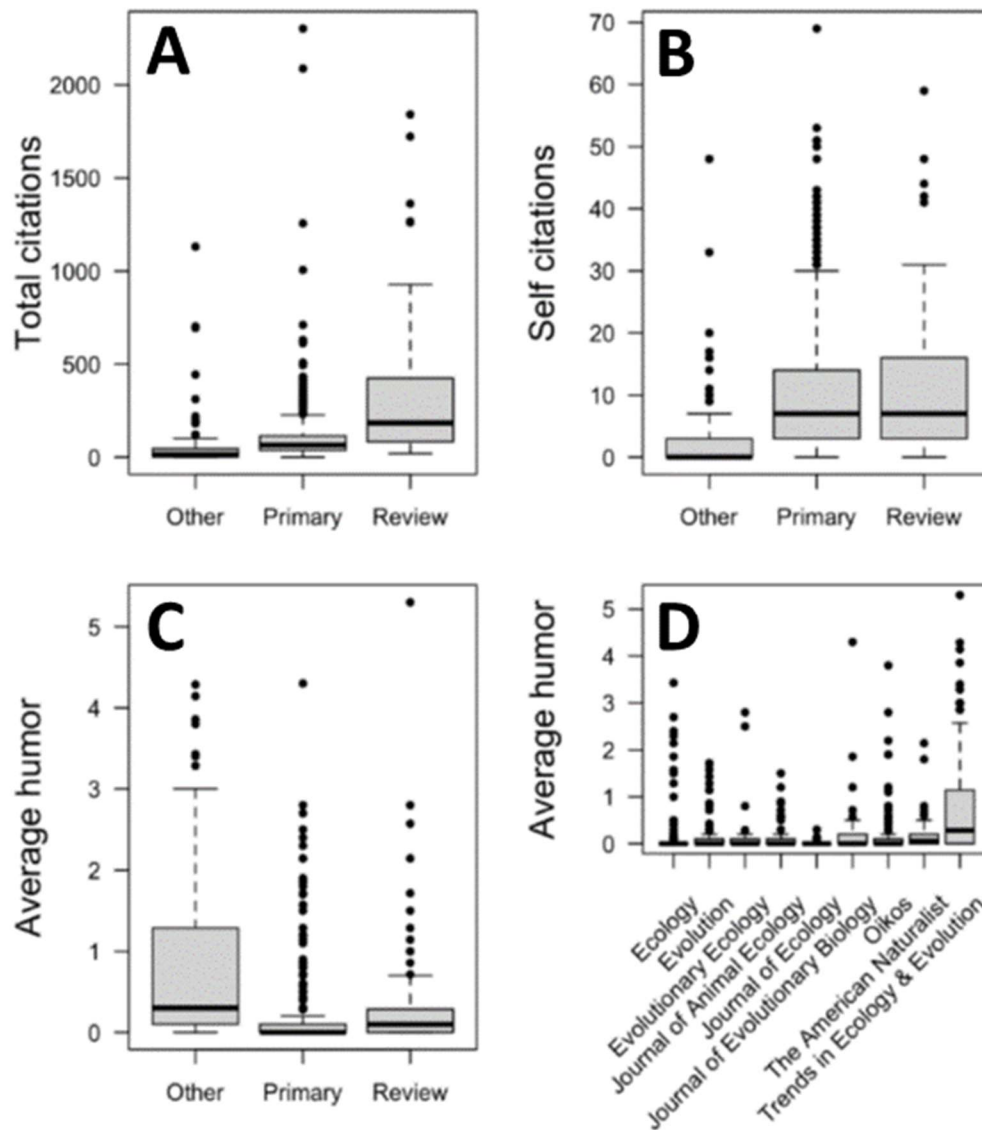

454

455 Figure 1. Total citations (A) and self citations (B) compared among article types (Other,  
456 Primary, or Review); and average humour scores compared among article types (C) and among  
457 journals (D).

458



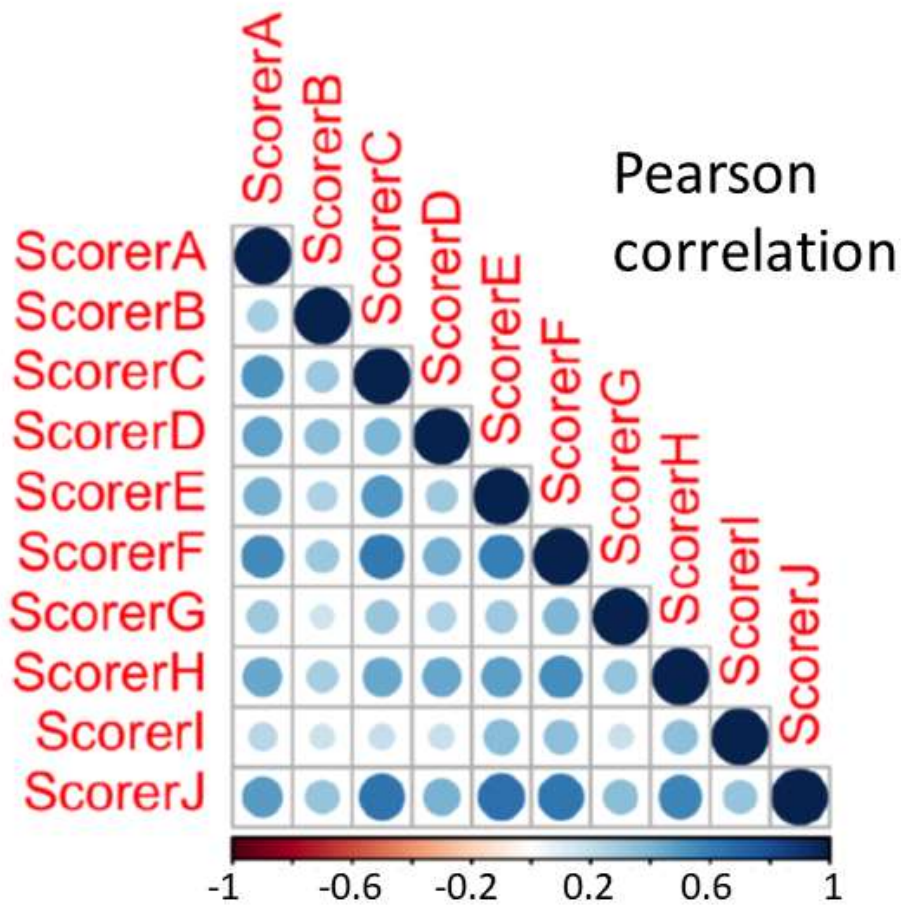

459

460 Figure 2: Concordance among scorers for title humour. The matrix shows Pearson correlation  
461 coefficient ( $r$ ) for each pairwise combination of scorers, across all scored titles. The overall  
462 concordance, measured by Light's kappa, was 0.34.

463

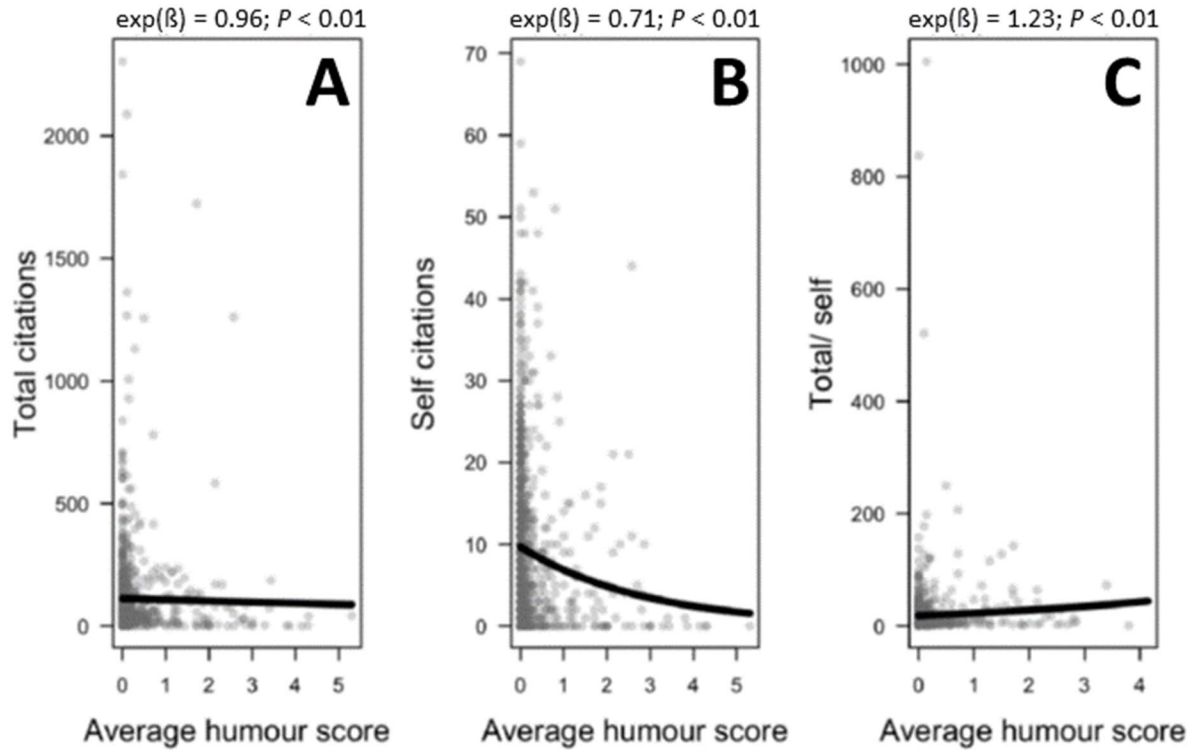

464

465

466 Figure 3: Humour and citation rates. Both total citations (A) and self citations (B) significantly

467 decreased with higher humour scores. However, the effect size is much larger for self citations,

468 and the ratio of total to self (C) citations *increases* with humour score.

469

470

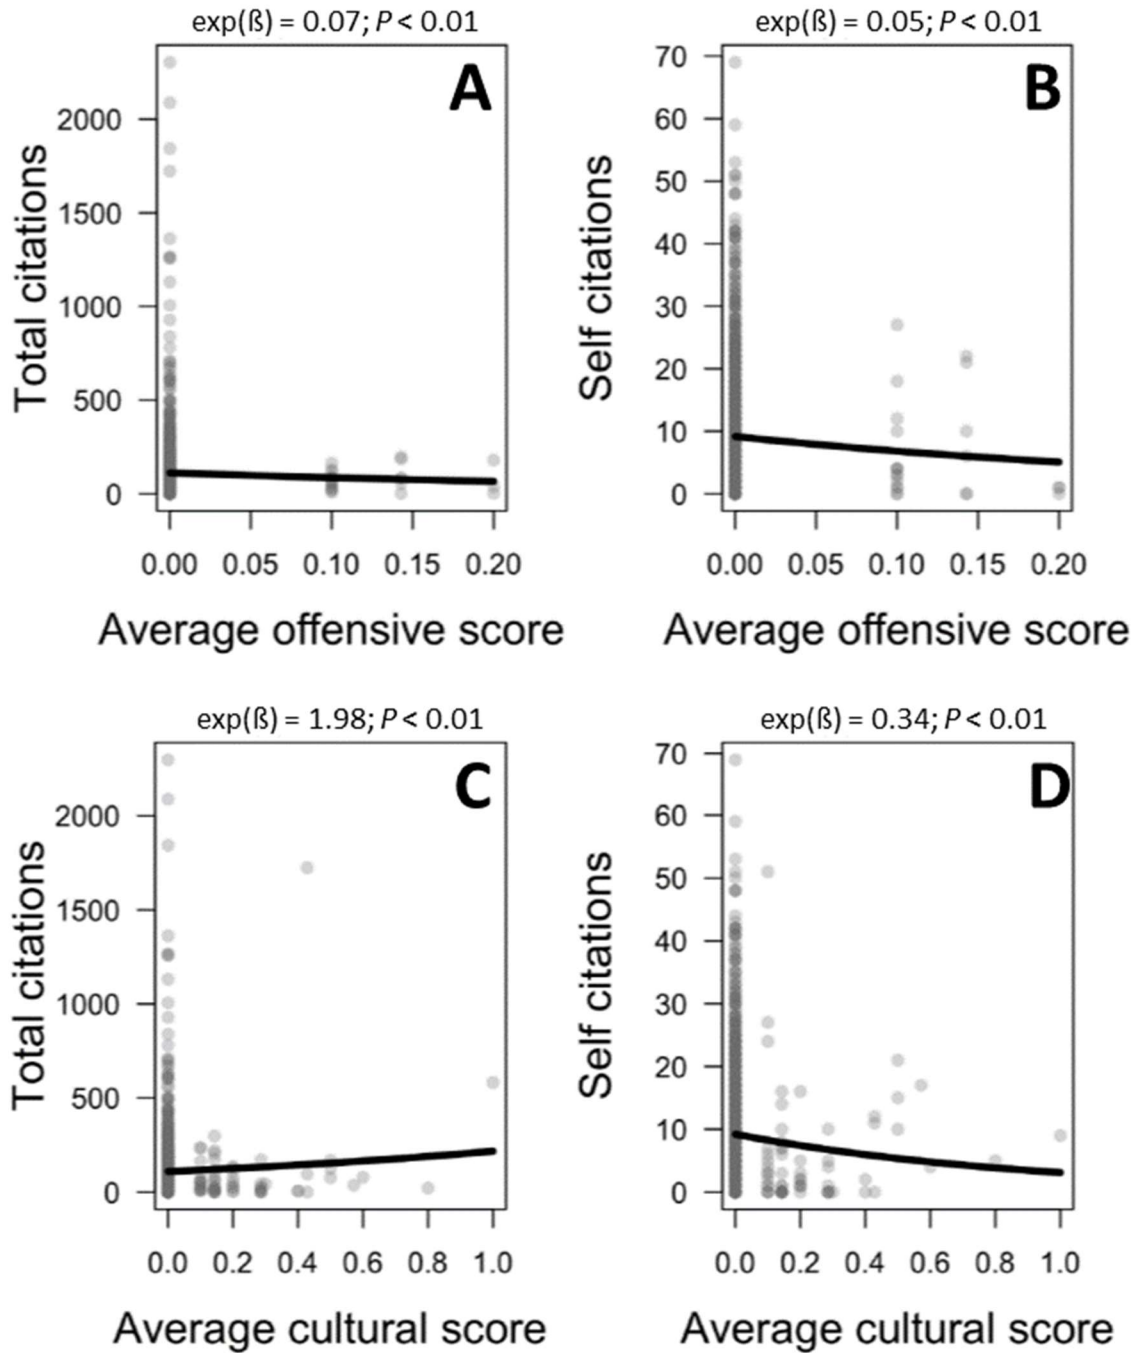

471

472 Figure 4: Offensive titles, cultural references, and citation rates. Total citations decreased  
473 significantly with higher offensive scores (A), but self citations decreased more strongly (B). The  
474 inclusion of cultural references was associated with higher total citations (C) but with *lower* self  
475 citations (D).

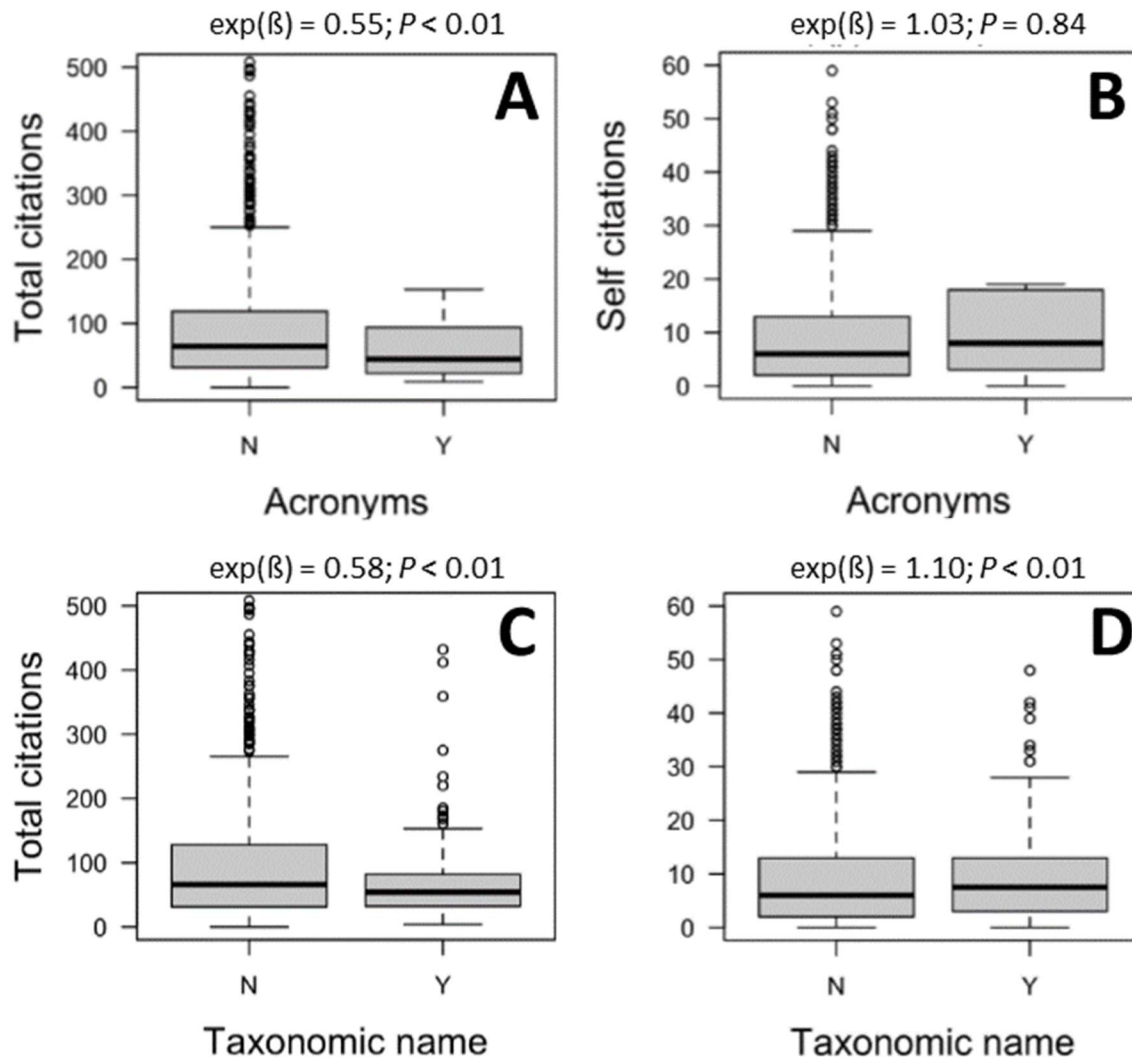

476

477 Figure 5: Acronyms, taxonomic names, and citation rates. The inclusion of acronyms was

478 associated with a significant decrease in total citations (A), but was not associated with self

479 citations (B). The inclusion of taxonomic names was associated with a strong decrease in total

480 citations (C) but a slight increase in self citations (D).

481

482

*Supplementary Material*

483

484 *Supplemental Tables and Figures: HeardCullWhiteSupplement.pdf*

485 *Table S1. AIC-selected model for total citations, primary research papers only*

486 *Table S2. AIC-selected model for self citations, primary research papers only*

487 *Figure S1. Associations with total citation rates (top row) and self citation (bottom row) for two-*

488 *part titles (“colon”), question titles, assertive-sentence titles, and titles including names*

489 *of political regions.*

490 *Figure S2. Title length and rates of total (A) and self (B) citation.*
