1 **If this title is funny, will you cite me?**

2 **Citation impacts of humour and other features of article titles in ecology and evolution**

3

4 Stephen B. Heard<sup>1,2</sup>, Chloe A. Cull<sup>1,3</sup>, and Easton R. White<sup>4</sup>

5

6 <sup>1</sup>Dept. of Biology, University of New Brunswick, Fredericton, NB Canada E3B 5A3

7

8 <sup>2</sup>Corresponding author. [sheard@unb.ca](mailto:sheard@unb.ca); Dept. of Biology, University of New Brunswick, PO

9 Box 4400, Fredericton, NB Canada E3B 5A3. Phone: 506-452-6047. FAX: 506-435-

10 3570.

11

12 <sup>3</sup>Current address: Department of Biology, Concordia University, 7141 Sherbrooke Street West,

13 Montreal, QC Canada H4B 1R6

14

15 <sup>4</sup>Department of Biological Sciences, University of New Hampshire, Durham, NH, USA, 03824

16

17 Running Title: *Citation impacts of funny paper titles*

18

19 Statement of authorship: SBH designed the study and led writing. CAC compiled literature and

20 citation counts and contributed to the writing. ERW led data analysis and contributed to the

21 writing.

22 This study was reviewed and approved by the Research Ethics Board of the University of New

23 Brunswick (REB #2020041).

24  
25  
26  
27  
28  
29  
30  
31  
32  
33  
34  
35  
36  
37  
38  
39  
40  
41  
42  
43  
44  
45  
46

## **Abstract**

Titles of scientific papers pay a key role in their discovery, and “good” titles engage and recruit readers. A particularly interesting aspect of title construction is the use of humour, but little is known about whether funny titles boost or limit readership and citation of papers. We used a panel of volunteer scorers to assess title humour for 2,439 papers in ecology and evolution, and measured associations between humour scores and subsequent citation (both self-citation and citation by others). Papers with funnier titles were cited less often, but this appears to result from a confound with paper importance. Self-citation data suggest that authors give funnier titles to papers they consider less important. After correction for this confound, papers with funny titles have significantly *higher* citation rates, suggesting that humour recruits readers. We also examined associations between citation rates and several other features of titles. Inclusion of acronyms and taxonomic names was associated with lower citation rates, while assertive-statement phrasing and presence of colons, question marks, and political regions were associated with somewhat higher citation rates. Title length had no effect on citation. Our results suggest that scientists can use creativity with titles without having their work condemned to obscurity.

## **Key Words**

humour, titles, scientific writing, citation, research impact

47

48

## Introduction

49

50 Do titles matter? It's easy to find advice about constructing "good" titles for academic  
51 papers (e.g., Thomson and Kamler 2013, Silvia 2014, Saramäki 2018, Belcher 2019, Hofmann  
52 2019, Heard 2022). By "good" titles, we generally agree that we mean those that engage readers  
53 and thus recruit them to a paper. It seems obvious that titles *should* matter in this way: they're  
54 generally the first encounter a potential reader has with a paper, and they're much more widely  
55 (and easily) communicated than papers themselves. Belcher (2019), for example, recommends  
56 titles that aren't too broad, avoid abstract terms, name specific research subjects (such as species  
57 or places), include searchable keywords and verbs, and avoid cleverness or wit – among other  
58 things. There isn't strong agreement, though, with advice from other sources sometimes  
59 concurring with Belcher's and sometimes contradicting it. Moreover, it's rare for advice of this  
60 sort to be supported by data.

61 The availability of large citation-rate datasets has made possible correlative analysis of at  
62 least one possible consequence of "good" titles: if a good title attracts readership, it should also  
63 make it more likely that the paper is cited. Conversely, papers whose bad titles repel, or at least  
64 fail to engage, readers are less likely to be cited. So what, empirically, makes a good title? The  
65 literature promises much, but delivers relatively little. For most easily-scored features of article  
66 titles, measured effects are weak (e.g., Costello et al. 2019) and inconsistent both among and  
67 within disciplines. As an example, consider title length. Most advice favours short titles, but also  
68 titles that clearly communicate an article's contents (the fundamental contradiction between  
69 those suggestions is hard to miss). While most studies find short titles to have higher citation

70 rates, a few have found the opposite, some find no association at all, and still others find  
71 associations that shift across disciplines (review: Heard 2021). In almost every study, though,  
72 title length explains only a small fraction of variation in citation rates. The literature for other  
73 title features (such as the use of question marks, colons, and hyphens and the inclusion of  
74 geographic place names) is similarly mixed. About the only title feature on which the literature is  
75 consistent is that titles including scientific names of genera or species are less cited than those  
76 that do not (Fox and Burns 2015, Yuret 2018, Murphy et al 2019). The picture that emerges from  
77 this work is that many features of titles are indeed associated with differences in citation rate –  
78 but that most associations are weak, and many are inconsistent. And yet it’s difficult to imagine  
79 that titles really don’t matter.

80         A major gap in our knowledge involves humour. Do funny titles attract reader attention,  
81 and thus increase impact? Or do they suggest that readers shouldn’t take the work seriously, and  
82 thus decrease impact? Some writing guides explicitly advise against the use of humour in titles  
83 (e.g., Thomson and Kamler 2013:85, Mack 2018:47, Belcher 2019:288). However, just three  
84 papers to our knowledge have attempted to put evidence behind this advice – likely because  
85 humour resists the kind of automated scoring that makes other features of titles easy to study.  
86 Sagi and Yechiam (2008) used panels of undergraduates to assess humour in titles of psychology  
87 papers, and found that the funniest titles were cited (slightly) less. Perhaps, they reasoned, this is  
88 because “scientific publication is considered a serious matter, and humor seems antithetical to  
89 it”. Subotic and Mukherjee (2014) attempted to replicate Sagi and Yechiam’s result (again for  
90 psychology papers), but instead found a positive effect of humour on downloads but no effect on  
91 citations. Finally, Murphy et al. (2019) found no significant effect of title humour on citation rate  
92 for ecology and entomology papers. Three other studies have examined related attributes of

93 titles: Haslam et al. (2008) found no effect on citation of “catchiness” (a title could be catchy  
94 because it was funny, or for many other reasons) Keating et al. (2019) found a negative effect of  
95 title sarcasm, and Mammola et al. (2022) found no effect of title “pleasantness”). Together this  
96 work provides little evidence that humour helps, and yet funny titles (and the papers that bear  
97 them) are widely shared on social media and stick in memory. This incongruity suggests that  
98 humour in scientific titles deserves further study, including of the possibility that humour in titles  
99 may be correlated with other aspects of papers that influence their later citation.

100 We used citation rate data for 2,439 papers in ecology and evolution, taken from nine  
101 well-known journals, to ask whether humour in titles influences subsequent impact. We used  
102 self-citation data to control for possible effects of underlying differences in paper importance.  
103 We also considered two features of titles that are closely related to humour: cultural references  
104 and titles that could be considered offensive. Finally, we consider possible effects of a variety of  
105 other title features, including length, use of colons and questions, and inclusion of taxonomic and  
106 geographic names. Effects on citation rates were mostly subtle, but we present evidence that,  
107 after controlling for paper importance, funny titles increase impact. We regret, therefore, being  
108 unable to think of a funnier title for this paper.

109

110

## 111 **Methods**

112

### 113 *Compiling papers*

114 We compiled the titles for every paper published in 2000 and 2001 in nine well-known  
115 ecology and evolution journals: *The American Naturalist*, *Ecology*, *Evolution*, *Evolutionary*

116 *Ecology, Journal of Animal Ecology, Journal of Ecology, Journal of Evolutionary Biology,*  
117 *Oikos, and Trends in Ecology and Evolution.* Our choice of journals was somewhat arbitrary (in  
118 particular, we did not consider impact factor), but these journals are well represented in  
119 university libraries, familiar to scientists in the field, and as a set capture both North American  
120 and European publication. Our compilation included 2,439 papers. We categorized papers as  
121 primary research articles, review articles, and “other”, with that last category including less  
122 standard forms such as “forum review” articles (*Oikos*) and “journal club” articles (*Trends in*  
123 *Ecology and Evolution*).

124

125 *Scoring titles*

126 We recorded whether each paper’s title was a question or an assertive sentence (a  
127 declarative statement of a main result), and whether it was a two-part title (using a colon, dash,  
128 etc.). We also scored titles (yes/no) for the presence of acronyms or initialisms, for the inclusion  
129 of the scientific (Latin) name of a genus or species, and for the mention of a political region  
130 (country, state/province, etc.). We then assembled a group of 10 “humour scorers”, who received  
131 a spreadsheet of titles and were asked to score them for humour, offensiveness, and the presence  
132 of cultural references (allusions to books, movies, music, memes, and other non-scientific  
133 cultural knowledge). Journal names and author lists were redacted from the spreadsheets sent to  
134 humour scorers, and they were instructed not to look up any information about a paper beyond  
135 its title. Each scorer received the full set of 2,439 titles, but in a different random order. We  
136 instructed scorers to work in 20 minute sessions to avoid task fatigue, not to score more than 8  
137 20-minute sessions in a day, and to score each title with their screen adjusted so that only that  
138 title was visible. Scorers were students or employees of the University of New Brunswick,

139 Fredericton, New Brunswick, Canada. We had (multiple) male and female scorers and scorers  
140 originating in North America and in the Global South; their ages ranged approximately from 20  
141 to 40. All scorers gave informed consent before their involvement, and the study was reviewed  
142 and approved by the Research Ethics Board of the University of New Brunswick (REB  
143 #2020041).

144 We had scorers assess humour on a 7-point scale, from zero (completely serious) to 6  
145 (extremely funny). We did not attempt to calibrate scales across scorers. Scorers were asked to  
146 infer the author's attempt at humour, rather than their own assessment of how funny the title was,  
147 and they were asked to ignore the subject of the article in assessing humour.

148 We asked scorers to identify any titles they found offensive. In contrast to the humour  
149 scoring, here we asked scorers to report their own feelings rather than their inference about the  
150 authors' intent. Also in contrast to humour scoring, we allowed for a title to be found offensive  
151 as a result of the article's subject (for example, a scorer might be offended by the use of humour  
152 in the title of an article addressing a very serious subject).

153 We asked scorers to identify titles that included cultural references of any sort (books,  
154 movies, music, memes, etc.). In a few cases, scorers reported that they suspected a cultural  
155 reference but could not identify its origin; we instructed them to include these instances. We did  
156 not restrict the age of a "cultural reference". Thus, allusions to Vivaldi and Lil Nas X are both  
157 cultural references and are treated equally in our analyses. We acknowledge, however, that  
158 scorers might sometimes miss less current examples.

159

160 *Tracking citations*

161           Because a minority of titles included humour or cultural references, we subset the titles  
162 database before gathering citation data. We first identified all titles for which at least one scorer  
163 recorded either a non-zero humour score or a cultural reference. There were 414 such titles, and  
164 all underwent citation tracking. From the remaining 2,025 titles, we randomly selected 650 for  
165 tracking, giving us a citation-tracked dataset of 1,064 titles. We randomized the order of titles  
166 before counting citations, because citations accumulate through time. We used Scopus<sup>TM</sup> to  
167 count citations, recording the total number of citations from publication until the date of  
168 checking. We divided total citations into self- and other-citation. Self-citations were citations of  
169 the focal paper by any paper that shared at least one author; other-citations were citations of the  
170 focal paper by any paper with a non-overlapping set of authors. We use self-citations as an  
171 indicator of a paper's intrinsic importance, reasoning that the authors' likelihood of later citing  
172 their own paper depends on its content, not on its title.

173

#### 174 *Data analysis*

175           Our full data set will be available in the Supplementary Materials with the published  
176 version of this preprint. We used generalized linear models with Poisson (citation counts) or  
177 Gaussian (title attributes) error terms to explore relationships between titles and citation impact.  
178 Our primary research question was whether title humour influenced citation rate; because  
179 offensiveness and cultural references are intertwined with humour, their influences on citation  
180 was a secondary research question. We separated review articles from primary ones in these  
181 analyses, because we found authors have different practices for use of humour between article  
182 types. Finally, to complement previous studies we also examined effects on citation of several



183 other title features, including length, use of colons and questions, and inclusion of taxonomic and  
184 geographic names. This also let us control for these variables in our analysis of title humour.

185 We measured agreement among humour scorers by calculating pairwise Pearson  
186 correlation coefficients among scorers and calculating Light's (1971) kappa as an overall  
187 measure of concordance. Light's kappa is the mean of all possible pairwise combinations of  
188 kappa scores between raters, where each  $\kappa = (P(a) - P(e)) / (1 - P(e))$ . In this expression,  $P(a)$  is the  
189 observed fraction of agreement and  $P(e)$  is the expected fraction of agreement due to chance.  
190 Kappa is often referred to as "interrater reliability", although this implies scorers are succeeding  
191 or failing at measuring an objective underlying measurement. In our case, since humour is  
192 subjective, we are using kappa to measure agreement, not reliability, and so we avoid the latter  
193 term.

194 We assessed the effect of various title attributes on both total citation count and self-  
195 citation count using a series of generalized linear models, each with a Poisson error structure.  
196 Specifically, we examined the effect of the average humour, offensiveness, and cultural-  
197 reference scores for each title (Avg\_humour, Avg\_offense, Avg\_culture), as well as article type  
198 (PrimaryReviewOther), whether the title was phrased as a question (Question), whether the title  
199 was assertive (Assertive), the presence of a colon or dash in the title (Colon), the presence of any  
200 acronyms or initialisms (Acronyms), whether the political region was noted in the title  
201 (Location), and the presence of a taxonomic name (Taxonomic\_name),. For humour, we also  
202 calculated an importance-corrected citation rate as total citations divided by self citations, and  
203 tested a similar generalized linear model. We use this test primarily as a way of illustrating the  
204 importance effect, recognizing that it is not independent of the separate total- and self-citation  
205 tests. We assessed each combination of these predictor variables and ranked models according

206 to AIC criteria – once for an analysis including all article types, and then again considering only  
207 primary research articles. We present only the best fitting model for each response variable.  
208 Because there was some multicollinearity among title characteristics, we did not include highly-  
209 correlated ( $>0.7$ ) predictor variables in the same model. We did not include offensiveness or  
210 cultural-reference scores in the multivariate models as these are conceptually related to, and  
211 correlated with, humour. We examined residual plots to verify that model assumptions were met.  
212 Unless otherwise specified, for all reported results  $P < 0.01$ .

213

## 214 **Results**

215

216 Citation counts for the papers we tracked were extremely variable, ranging from zero to  
217 just over 2,300 (median 64; mean 111). Unsurprisingly, review papers were cited more heavily,  
218 on average, than primary research papers; “other” papers had the lowest citation rates (Figure  
219 1A). The citation advantage of review papers was far smaller, but still significant, for self-  
220 citation (Figure 1B). Among article types, titles from “other” papers were rated significantly  
221 more humorous than those from review and primary articles (Figure 1C). Humour did not vary  
222 significantly among journals, except that *Trends in Ecology and Evolution* (where all papers  
223 belonged to the review or “other” types) had significantly funnier titles than the rest (a higher  
224 average score and many more non-zero scores; Figure 1D). Our best fitting models and  
225 parameter estimates were similar whether we analyzed all articles or just primary research papers  
226 (compare Tables 1 and 2, for all articles, with Supplementary Materials, Tables S2 and S3, for  
227 primary research papers only). In what follows, we present only the more comprehensive  
228 analysis.

229 Few titles were funny: only 414 of 2,439 papers were assigned a non-zero humour score  
230 by even one scorer, and only 60 had at least 11 humour points (as they would if all scorers gave  
231 them the minimum non-zero humour score, or two scorers gave them the maximum score). The  
232 median humour score was zero (mean 0.096). We saw fairly low, but non-zero, agreement among  
233 scorers in their assessment of title humour. The overall concordance score (Light's kappa) was  
234 just 0.34; most pairwise (Pearson) correlations had  $r < 0.5$ , and over a third had  $r < 0.35$  (Figure  
235 2, and precise correlations in Supplemental Materials, Table S4). The title with the highest  
236 humour score was “Nice snake, shame about the legs”; this title also tied for the highest  
237 offensiveness score. Other titles with relatively high humour scores included “Some Like it Hot:  
238 Intra-Population Variation in behavioral Thermoregulation in Color-Polymorphic pygmy  
239 Grasshoppers”, “Is it Time to Bury the Ecosystem Concept? (With Full Military Honors, of  
240 Course!)”, and “The Competition □ Colonization Trade □ off is Dead; Long Live the  
241 Competition □ Colonization Trade □ off”. Only the first title received a non-zero humour score  
242 from every scorer.

243 Our best-performing models (Tables 1 and 2) suggested contributions to citation rate  
244 from title humour but also from phrasing titles as questions, including colons, acronyms,  
245 locations, and taxonomic names, and (for all article types but not for primary research papers  
246 alone) phrasing titles as assertive statements. However, some of these effects were weak (see  
247 below).

248 After we controlled for other predictors, total citations declined with average title humour  
249 (Figure 3A). The effect was relatively small, with a decrease of 4% in total citations for each 1  
250 point increase in average humour score, but this equates to a difference of 20.4% between the  
251 least and most humorous titles. There is, however, an important qualification: the pattern was

252 similar, but much stronger, for self citations, with an 82% decrease for the most humorous titles  
253 (Figure 3B). Thus, after correcting for underlying paper importance, funny title are cited more,  
254 not less (Figure 3C), with a 23% increase for each 1 point increase in humour score.

255 While we did not include offensiveness or cultural references in our AIC modeling, we  
256 examined their association with citation rates in isolation. Offensive titles were rare, with only 19  
257 of 2,439 titles scored as offensive by even a single scorer (median 0, mean 0.06). Citation rates  
258 declined with average offense score (Figure 4A). However, as for humour, there was an even  
259 stronger decline for self-citations (Figure 4B), suggesting that less important papers are given  
260 titles that our scorers judged offensive. Titles including cultural references show a pattern of  
261 increasing citation (Figure 4C), despite fewer self-citations (Figure 4D, again suggesting lower  
262 underlying paper importance). Interestingly, the detection of cultural references by our scorers  
263 was quite imperfect. 75 titles were recorded as including a cultural reference by at least one  
264 scorer, but only 5 were so recorded by a majority of scorers and none by all scorers..

265 Several other characteristics of paper titles were significant predictors of citation counts  
266 in the AIC model, but most of these effects were relatively weak. Titles with colons or question  
267 marks, those phrased as assertive statements, and those including names of political regions were  
268 more highly cited (Table 1 and Supplementary Material Figure S1, upper row), although only the  
269 colon effect was strong and the “assertive statement” effect disappeared when we analyzed only  
270 primary research articles; Supplementary Material Table S2). Effects on self-citation were  
271 mostly very weak (Supplementary Material Figure S1, lower row), except that titles mentioning  
272 political regions had moderately more self-citations. Finally, title length was excluded from all  
273 AIC models (Tables 1, 2) and made little difference to either total or self citation rates viewed in  
274 isolation (Supplementary Materials Figure S2).

275           We found stronger effects for the inclusion in titles of acronyms and taxonomic names.  
276   Each was associated with a sharp decrease in citation rates (acronyms 41%, Figure 5A; and  
277   taxonomic names 32%, Figure 5C). These effects cannot be explained by paper importance, as  
278   the inclusion of acronyms was not associated with self-citation (Figure 5B) and the inclusion of  
279   taxonomic names was associated with slightly higher self-citation (Figure 5D).

280

281

282

## Discussion

283

284           Despite the widespread availability of clear and firm advice on constructing “good” titles,  
285   the most striking pattern we document is simply that few easily measured attributes of titles seem  
286   to have strong associations with citation rates. This is broadly consistent with the literature (e.g.,  
287   Costello et al. 2019, Murphy et al. 2019, Mammola et al. 2022; review: Heard 2021).

288           There were some differences in humour scores among the three article types we  
289   distinguished. In particular, “other” articles (forum review and journal club papers) had both the  
290   highest humour scores and the lowest citation rates. This can account for the higher average  
291   humour scores for one journal (*Trends in Ecology and Evolution*), where the bulk of “other”  
292   papers were published. Otherwise, though, article type didn’t drive the patterns in citation rate  
293   we observed, as analyses restricted to primary research articles had very similar results to those  
294   including all three article types.

295           Our analysis suggests that humour in the title can increase a paper’s impact. It is true that  
296   the simplest analysis, correlating total citations with humour score, finds a (weak) negative  
297   relationship. However, such an analysis fails to account for the possibility that authors are less

298 likely to use humour in titling their more important papers. Our self-citation data strongly  
299 suggest that this is true: papers with funnier titles are subsequently cited less *by their own*  
300 *authors*. Since authors don't need titles to alert them to their own papers, self-citation provides a  
301 title-independent estimator of importance – unlike other-citations, for which effects of title and  
302 underlying importance on citation are inextricably confounded. Because the decline in self-  
303 citation with humour score is much steeper for self-citations than for other-citations, funny titles  
304 are actually over-cited, not under-cited, after correction for paper importance (Figure 3C).

305       Earlier literature has not considered the possibility of confounding between title humour  
306 and paper importance. An analysis for psychology papers by Sagi and Yechiam (2008), which  
307 found a negative association between total citations and title humour, did not attempt any  
308 correction for paper importance, via self-citation or otherwise. As a result, that analysis may well  
309 have drawn precisely the wrong conclusion. The same issue applies to analyses by Subotic and  
310 Mukherjee (2014) and Murphy et al. (2019), both of which found no effect of humour on total  
311 citation but, again, did not correct for paper importance. Advice to avoid humour in paper titles  
312 (e.g., Thomson and Kamler 2013:85, Mack 2018:47, Belcher 2019:288) is thus not well founded  
313 in evidence – at least, not if the concern is citation impact.

314       Scientists sometimes express two related worries about the use of humour: that funny  
315 titles might be seen as offensive, and that funny titles will be misunderstood by those who don't  
316 share the author's cultural background. Our data suggest three things about this. First, if these  
317 things happen, they don't affect citation much. Papers with titles identified as offensive were  
318 indeed cited less, but as for humour, analysis of self citations suggests that this can be more than  
319 explained by the use of such titles for less important papers. Second, the low concordance among  
320 our scorers suggest that even with a group of scorers of relatively homogeneous cultural

321 background, opinions about humour and offense vary widely. The simultaneous existence of  
322 *South Park* and *The Satanic Verses* should make it obvious that both humour and offense are  
323 deeply personal, and both will sometimes be perceived even when neither is intended. Third,  
324 even though some readers will miss cultural references in titles (it was commonplace for our  
325 scorers to differ in their detection), this does not interfere with discovery or impact of the papers:  
326 the use of cultural references was strongly associated with increased citation rates.

327 Other features of titles are significantly associated with citation rates, but most of the  
328 effect sizes are small – as has generally been true in previous studies. Citation rates are higher for  
329 two-part titles (those with colons, dashes, etc.) and a little higher for question and assertive  
330 sentence titles. Inclusion of a geographic region name increases citation a little, consistent with  
331 some other studies (Rostami et al. 2013, Nair and Gibbert 2015, Murphy et al. 2019) but  
332 contrasting with others (Jacques and Sebire 2010, Paiva et al. 2012, Abramo et al. 2016,  
333 Alimoradi et al. 2016, Yuret 2018, Costello et al. 2019). However, analysis of self citation  
334 suggests that this is likely explained by a tendency for authors to use geographic names in their  
335 more important papers. We do not have an explanation for this tendency, which surprised us.  
336 Title length, which is one of the most frequent targets of well-meaning advice, had virtually no  
337 effect on citation. This is broadly consistent with the literature (review: Heard 2021): shorter  
338 titles are sometimes found to be cited more, and sometimes found to be cited less, but the effects  
339 vary from weak to very weak. Keeping titles short may help typesetters, but seems to have no  
340 implication for authors or readers.

341 There were larger effects for taxonomic names: their inclusion is associated with a steep  
342 (32%) reduction in citation. The negative effect of taxonomic names in titles is one of the few  
343 citation effects to be consistent across studies (Fox and Burns 2015, Yuret 2018, Murphy et al.

344 2019). Readers appear to behave as if inclusion of a taxonomic name signals narrower scope of,  
345 and thus narrower interest in, a paper. This could be a reliable signal (papers including  
346 taxonomic names may, on average, genuinely be of narrower scope) or a misperceived one (with  
347 readers being deterred from papers that really are relevant to them). Since *self*-citations don't  
348 decline with the inclusion of a taxonomic name, we suspect that misperception is often involved.  
349 Authors may therefore wish to consider removing scientific names of taxa from titles.

350 Finally, we were surprised by the strong pattern for acronyms. Despite our deep  
351 familiarity with – perhaps even love for – acronyms (Barnett and Doubleday 2020), their  
352 appearance in a title is associated with a 41% decrease in citation rates, and this can't be  
353 explained by variation in paper importance. There were already good reasons to reduce our use  
354 of acronyms in writing; their apparent effect on citation impact may add another.

355 There is, of course, an important assumption behind our choice of citation rate as a  
356 variable to correlate with features of titles. Citation rate is only of interest if it says something  
357 useful about the reach or impact of a paper. Given that science is a fundamentally cumulative  
358 process, and given that modern citation practices involve an ethical responsibility to cite  
359 influential work, citation rate really does seem likely to be measuring something useful. In a few  
360 cases, of course, a paper may be heavily cited because it's wrong – for example, as an example  
361 of how an analysis can go astray – but we doubt that such citations account for a significant  
362 fraction of our database.

363 Ultimately, the factors that explain the citation impact of a paper are sure to be numerous,  
364 interrelated in complex fashion, and extending far beyond just the title. However, because titles  
365 are the first point of contact with a paper for most readers, we suspect interest in their  
366 construction will remain strong. In a sense, our results are mostly good news for authors: few



367 title features (barring acronyms and taxonomic names) work against citation. That means  
368 scientists can use titles creatively, even inserting touches of humour (Heard 2014), without fear  
369 of their work ending up in undeserved obscurity.

370

371

372

373

### **Acknowledgements**

374

375 We thank our scorers, who read more paper titles in a couple of weeks than some people  
376 do in a career. Lyndsey Burrell grappled bravely and well with searching and summarizing a  
377 rather peculiar literature. We are grateful to Joel Dacks, an anonymous reviewer, and members  
378 of the PEER Group, Dept. of Biology, University of New Brunswick, for helpful comments on  
379 the work and the manuscript. This research was funded by the Natural Sciences and Engineering  
380 Research Council of Canada via a Discovery Grant to SBH.

381

382 **References**

383 Abramo, G., D'Angelo, C.A., Di Costa, F., 2016. The effect of a country's name in the title of a  
384 publication on its visibility and citability. *Scientometrics* 109, 1895–1909.

385 <https://doi.org/10.1007/s11192-016-2120-1>

386 Alimoradi, F., Javadi, M., Mohammadpooras, A., Moulodi, F., Hajizadeh, M., 2016. The effect  
387 of key characteristics of the title and morphological features of published articles on their  
388 citation rates. *Annals of Library and Information Studies* 63, 74–77.

389 Barnett, A., Doubleday, Z., 2020. The growth of acronyms in the scientific literature. *eLife* 9.

390 <https://doi.org/10.7554/eLife.60080>

391 Belcher, W., 2019. *Writing Your Journal Article in Twelve Weeks, Second Edition: A Guide to*  
392 *Academic Publishing Success*, 2nd ed. Sage Publications.

393 Costello, M.J., Beard, K.H., Primack, R.B., Devictor, V., Bates, A.E., 2019. Are killer bees good  
394 for coffee? The contribution of a paper's title and other factors to its future citations.

395 *Biological Conservation* 229, A1–A5. <https://doi.org/10.1016/j.biocon.2018.07.010>

396 Fox, C.W., Burns, C.S., 2015. The relationship between manuscript title structure and success:  
397 Editorial decisions and citation performance for an ecological journal. *Ecology and*  
398 *Evolution* 5, 1970–1980. <https://doi.org/10.1002/ece3.1480>

399 Haslam, N., Ban, L., Kaufmann, L., Loughnan, S., Peters, K., Whelan, J., Wilson, S., 2008. What  
400 makes an article influential? Predicting impact in social and personality psychology.

401 *Scientometrics* 76, 169–185. <https://doi.org/10.1007/s11192-007-1892-8>

402 Heard, S., 2014. On whimsy, jokes, and beauty: can scientific writing be enjoyed? Ideas in

403 *Ecology and Evolution* 7, 64–72. <https://doi.org/10.4033/iee.2014.7.14.f>

- 404 Heard, S.B., 2022. The Scientist's Guide to Writing, 2nd Edition: How to Write More Easily and  
405 Effectively throughout Your Scientific Career, 2nd ed. Princeton University Press.
- 406 Heard, S.B., 2021. Strong opinions, weak effects: What makes a good title? Blog post, Scientist  
407 Sees Squirrel, March 23, 2021  
408 [https://scientistseesquirrel.wordpress.com/2021/03/23/strong-opinions-weak-effects-  
409 what-makes-a-good-title/](https://scientistseesquirrel.wordpress.com/2021/03/23/strong-opinions-weak-effects-what-makes-a-good-title/)
- 410 Hofmann, A., 2019. Scientific Writing and Communication: Papers, Proposals, and  
411 Presentations, 4th ed. Oxford University Press.
- 412 Jacques, T.S., Sebire, N.J., 2010. The impact of article titles on citation hits: an analysis of  
413 general and specialist medical journals. JRSM Short Rep 1, 2.  
414 <https://doi.org/10.1258/shorts.2009.100020>
- 415 Keating, D.M., Richards, A.S., Palomares, N.A., Banas, J.A., Joyce, N., Rains, S.A., 2019.  
416 Titling Practices and Their Implications in Communication Research 1970-2010: Cutesy  
417 Cues Carry Citation Consequences1. Communication Research.  
418 <https://doi.org/10.1177/0093650219887025>
- 419 Light, R.J., 1971. Measures of response agreement for qualitative data: Some generalizations and  
420 alternatives. Psychological Bulletin 76, 365–377. <https://doi.org/10.1037/h0031643>
- 421 Mack, C., 2018. How to Write a Good Scientific Paper, 1st ed. SPIE.
- 422 Mammola, S., Piano, E., Doretto, A., Caprio, E., Chamberlain D., 2022. Measuring the influence  
423 of non-scientific features on citations. Scientometrics (2022).  
424 <https://doi.org/10.1007/s11192-022-04421-7>
- 425 Murphy, S.M., Vidal, M.C., Hallagan, C.J., Broder, E.D., Barnes, E.E., Horna Lowell, E.S.,  
426 Wilson, J.D., 2019. Does this title bug (Hemiptera) you? How to write a title that

- 427 increases your citations. *Ecological Entomology* 44, 593–600.
- 428 <https://doi.org/10.1111/een.12740>
- 429 Nair, L.B., Gibbert, M., 2016. What makes a ‘good’ title and (how) does it matter for citations?
- 430 A review and general model of article title attributes in management science.
- 431 *Scientometrics* 107, 1331–1359. <https://doi.org/10.1007/s11192-016-1937-y>
- 432 Paiva, C.E., Lima, J.P.S.N., Paiva, B.S.R., 2012. Articles with short titles describing the results
- 433 are cited more often. *Clinics* 67, 509–513. [https://doi.org/10.6061/clinics/2012\(05\)17](https://doi.org/10.6061/clinics/2012(05)17)
- 434 Rostami, F., Mohammadpoorasl, A., Hajizadeh, M., 2014. The effect of characteristics of title on
- 435 citation rates of articles. *Scientometrics* 98, 2007–2010. [https://doi.org/10.1007/s11192-](https://doi.org/10.1007/s11192-013-1118-1)
- 436 [013-1118-1](https://doi.org/10.1007/s11192-013-1118-1)
- 437 Sagi, I., Yechiam, E., 2008. Amusing titles in scientific journals and article citation. *Journal of*
- 438 *Information Science* 34, 680–687. <https://doi.org/10.1177/0165551507086261>
- 439 Saramäki, J., 2018. *How to Write a Scientific Paper: An Academic Self-Help Guide for PhD*
- 440 *Students*, 1st ed. Independently Published.
- 441 Silvia, P., 2014. *Write It Up: Practical Strategies for Writing and Publishing Journal Articles*, 1st
- 442 ed. American Psychological Association (APA).
- 443 Subotic, S., Mukherjee, B., 2014. Short and amusing: The relationship between title
- 444 characteristics, downloads, and citations in psychology articles. *Journal of Information*
- 445 *Science* 40, 115–124. <https://doi.org/10.1177/0165551513511393>
- 446 Thomson, P., Kamler, B., 2013. *Writing for Peer Reviewed Journals*, 1st ed. Routledge.
- 447 Yuret, T., 2018. Citation performance of publications grouped by keywords, titles, and abstracts.
- 448 *Data and Information Management* 2, 83–90. <https://doi.org/10.2478/dim-2018-0006>
- 449

450 **Figure and Table Legends**

451

452 Table 1. Best fitting model after AIC model selection for total citations. For each covariate, we  
453 present the log effect and (standard error) and significance level, denoted by stars.

454

455 Table 2. Best fitting model after AIC model selection for self-citations. For each covariate, we  
456 present the log effect and (standard error) and significance level, denoted by stars.

457

458 Figure 1. Total citations (A) and self citations (B) compared among article types (Other,  
459 Primary, or Review); and average humour scores compared among article types (C) and  
460 among journals (D). Boxplots show the median (thick horizontal line), interquartile range  
461 (25<sup>th</sup> and 75<sup>th</sup> percentile) for the box, and 1.5 x interquartile range for the box whiskers.

462

463 Figure 2: Concordance among scorers for title humour. The matrix shows Pearson correlation  
464 coefficient ( $r$ ) for each pairwise combination of scorers, across all scored titles. The  
465 overall concordance, measured by Light's kappa, was 0.34.

466

467 Figure 3: Humour and citation rates. Both total citations (A) and self citations (B) significantly  
468 decreased with higher humour scores. However, the effect size is much larger for self  
469 citations, and the ratio of total to self (C) citations *increases* with humour score.

470

471 Figure 4: Offensive titles, cultural references, and citation rates. Total citations decreased  
472 significantly with higher offensive scores (A), but self citations decreased more strongly

473 (B). The inclusion of cultural references was associated with higher total citations (C) but  
474 with *lower* self citations (D).

475

476 Figure 5: Acronyms, taxonomic names, and citation rates. The inclusion of acronyms was  
477 associated with a significant decrease in total citations (A), but was not associated with  
478 self citations (B). The inclusion of taxonomic names was associated with a strong  
479 decrease in total citations (C) but a slight increase in self citations (D). Boxplots show the  
480 median (thick horizontal line), interquartile range (25<sup>th</sup> and 75<sup>th</sup> percentile) for the box,  
481 and 1.5 x interquartile range for the box whiskers.

482

483 Table 1: Best fitting model after AIC model selection for total citations. For each covariate, we  
 484 present the log effect and (standard error) and significance level, denoted by stars.

|                           | <i>Dependent variable:</i> |
|---------------------------|----------------------------|
|                           | Total Citations            |
| PrimaryReviewOtherPrimary | 0.542***<br>(0.013)        |
| PrimaryReviewOtherReview  | 1.662***<br>(0.014)        |
| Question                  | 0.044***<br>(0.009)        |
| Assertive                 | 0.165***<br>(0.011)        |
| Colon                     | 0.416***<br>(0.006)        |
| Acronyms                  | -0.529**<br>(0.052)        |
| Location                  | 0.082***<br>(0.011)        |
| Taxonomic Name            | -0.389**<br>(0.010)        |
| Average Humour            | -0.096**<br>(0.006)        |
| Constant                  | 3.926***<br>(0.013)        |
| Observations              | 1,027                      |
| Log Likelihood            | -61,416.010                |
| Akaike Inf. Crit.         | 122,852.000                |

Note: \*p<0.1; \*\*p<0.05; \*\*\*p<0.01

485

486

487

488 Table 2: Best fitting model after AIC model selection for self-citations. For each covariate, we  
489 present the log effect and (standard error) and significance level, denoted by stars.

|                           | <i>Dependent variable:</i> |
|---------------------------|----------------------------|
|                           | Self Citations             |
| PrimaryReviewOtherPrimary | 1.125***<br>(0.057)        |
| PrimaryReviewOtherReview  | 1.327***<br>(0.064)        |
| Question                  | -0.076**<br>(0.035)        |
| Colon                     | 0.126***<br>(0.021)        |
| Location                  | 0.248***<br>(0.034)        |
| Average Humour            | -0.152***<br>(0.027)       |
| Constant                  | 1.109***<br>(0.057)        |
| Observations              | 1,027                      |
| Log Likelihood            | -6,062.415                 |
| Akaike Inf. Crit.         | 12,138.830                 |

Note: \*p<0.1; \*\*p<0.05; \*\*\*p<0.01

490



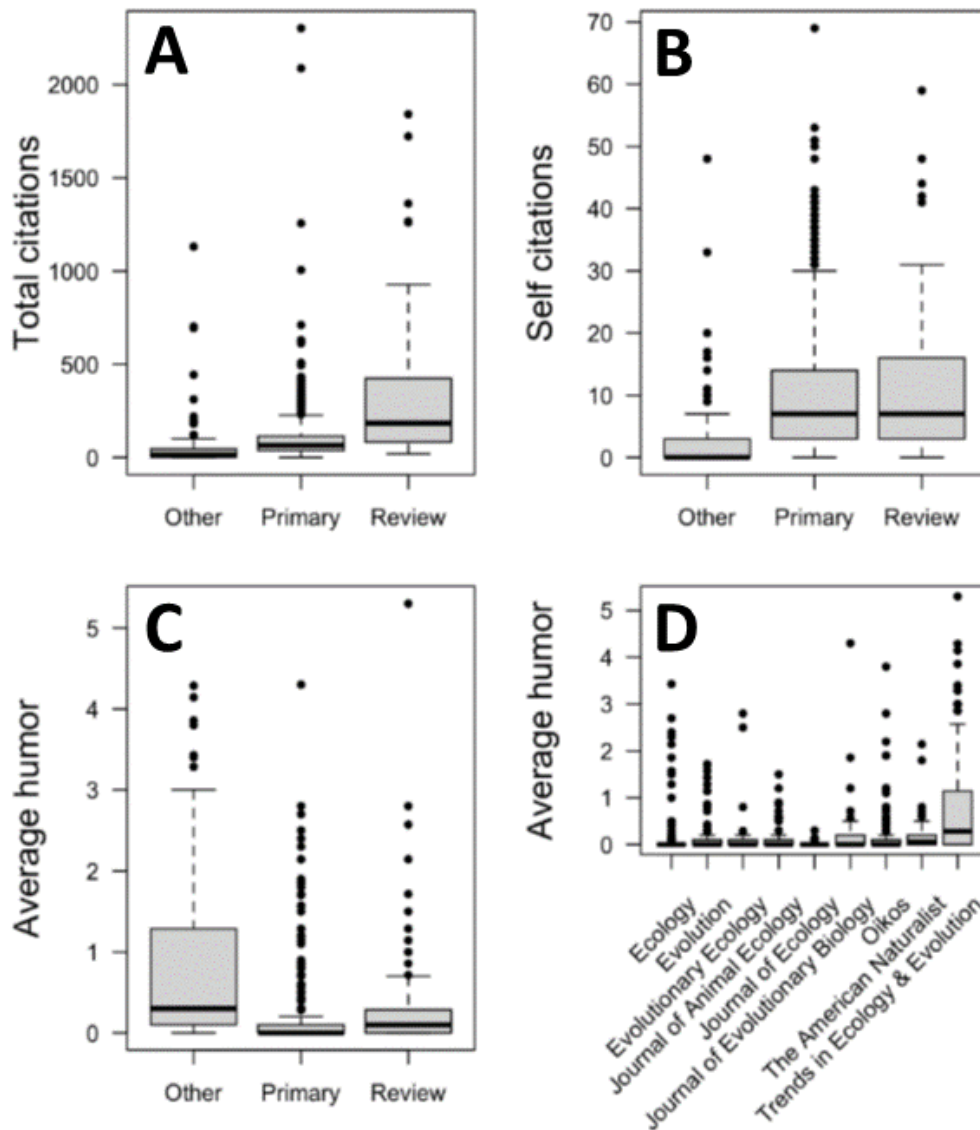

491

492 Figure 1. Total citations (A) and self citations (B) compared among article types (Other,  
493 Primary, or Review); and average humour scores compared among article types (C) and among  
494 journals (D). Boxplots show the median (thick horizontal line), interquartile range (25<sup>th</sup> and 75<sup>th</sup>  
495 percentile) for the box, and 1.5 x interquartile range for the box whiskers.

496

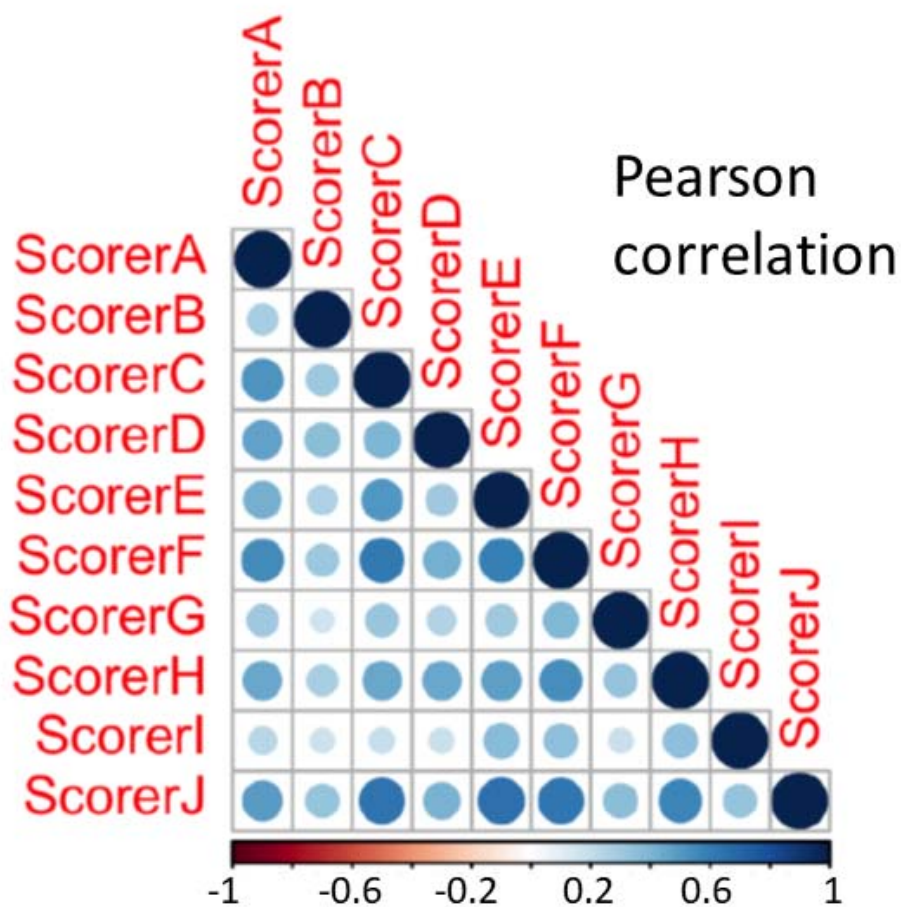

497

498 Figure 2: Concordance among scorers for title humour. The matrix shows Pearson correlation

499 coefficient ( $r$ ) for each pairwise combination of scorers, across all scored titles. The overall

500 concordance, measured by Light's kappa, was 0.34. Exact correlation coefficients can be found

501 in Supplementary Materials, Table S4.

502

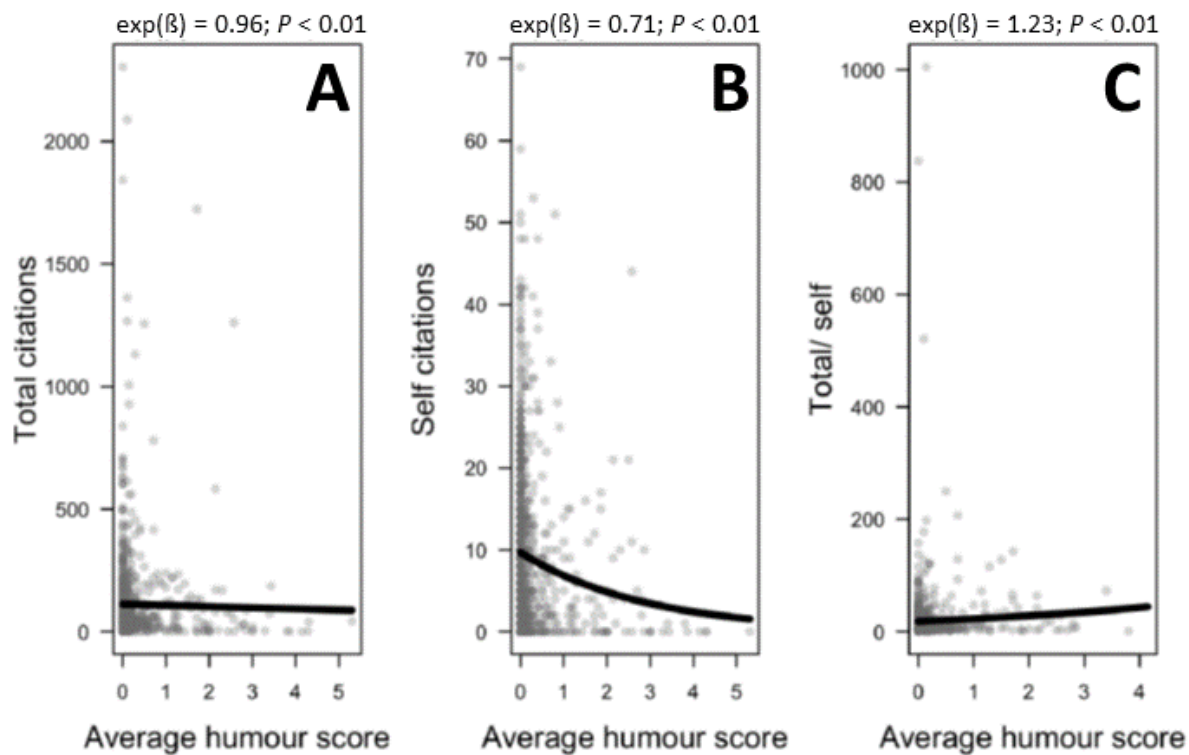

503

504

505 Figure 3: Humour and citation rates. Both total citations (A) and self citations (B) significantly  
506 decreased with higher humour scores. However, the effect size is much larger for self citations,  
507 and the ratio of total to self (C) citations *increases* with humour score.

508

509

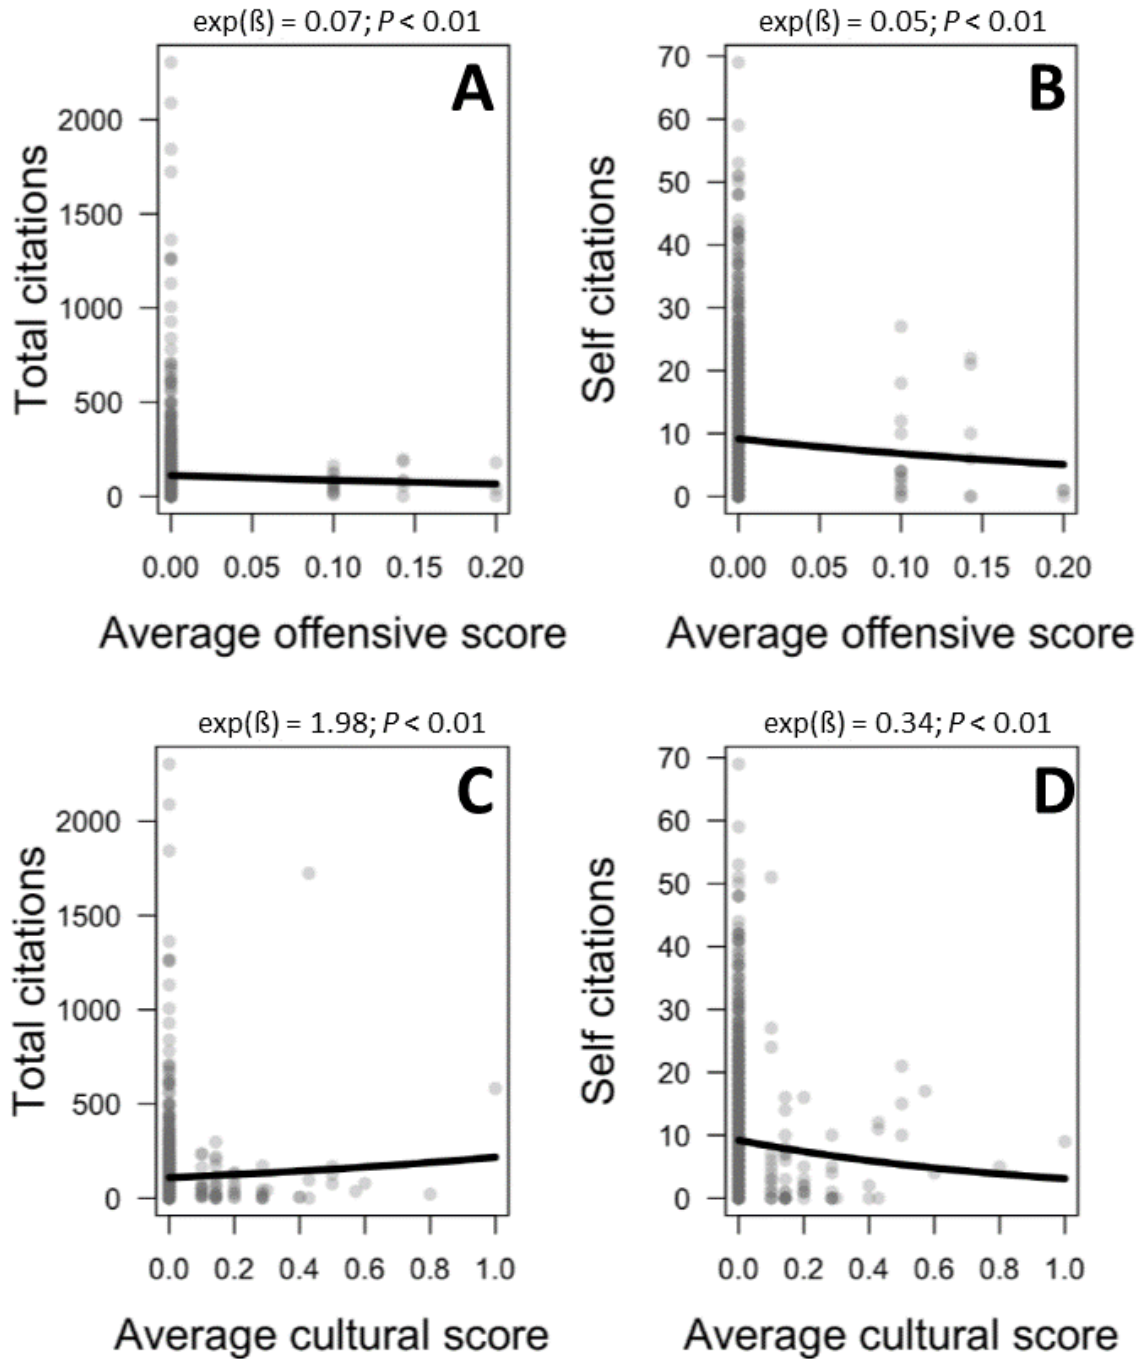

510

511 Figure 4: Offensive titles, cultural references, and citation rates. Total citations decreased  
512 significantly with higher offensive scores (A), but self citations decreased more strongly (B). The  
513 inclusion of cultural references was associated with higher total citations (C) but with *lower* self  
514 citations (D).

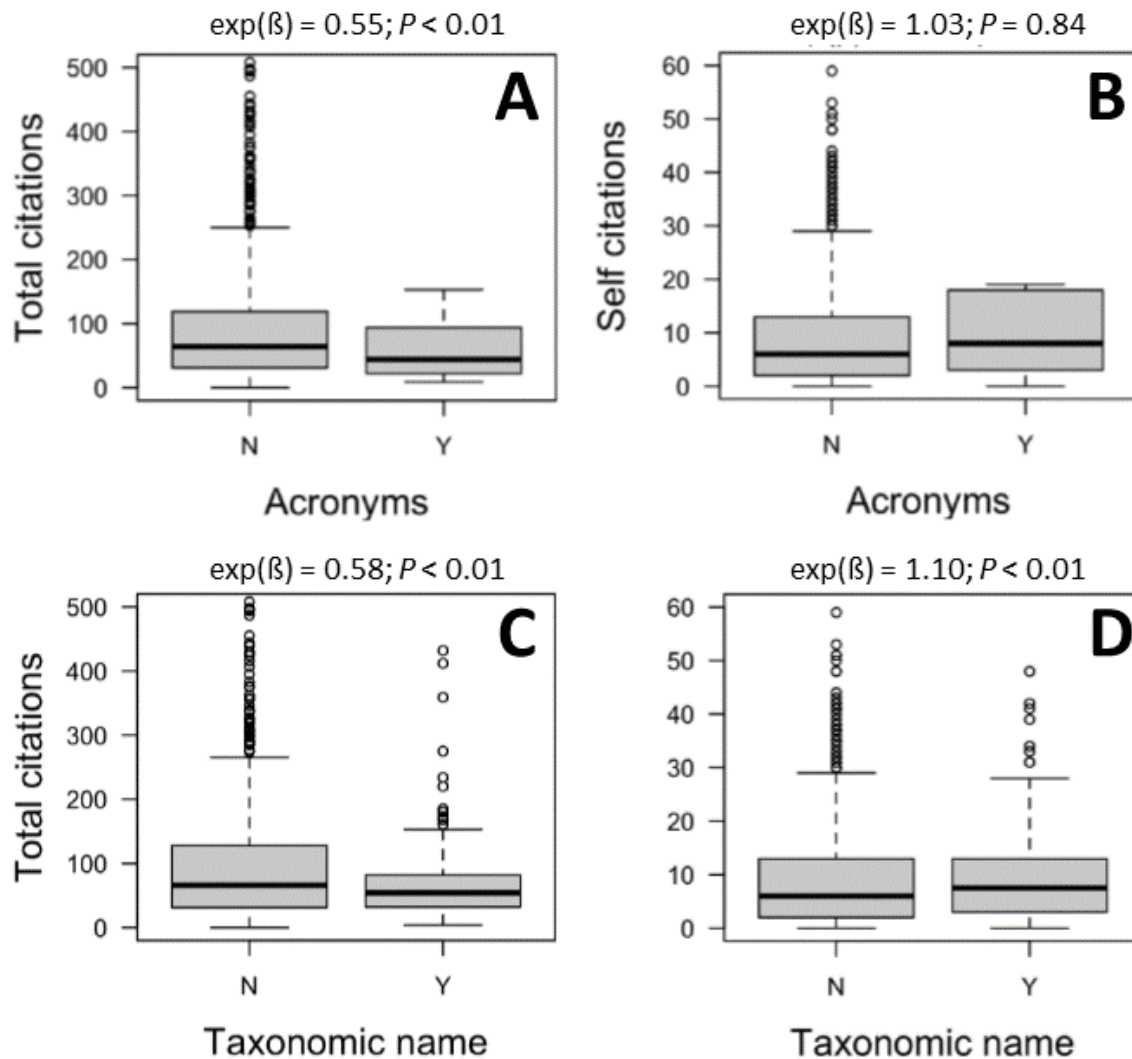

515

516 Figure 5: Acronyms, taxonomic names, and citation rates. The inclusion of acronyms was

517 associated with a significant decrease in total citations (A), but was not associated with self

518 citations (B). The inclusion of taxonomic names was associated with a strong decrease in total

519 citations (C) but a slight increase in self citations (D). Boxplots show the median (thick

520 horizontal line), interquartile range (25<sup>th</sup> and 75<sup>th</sup> percentile) for the box, and 1.5 x interquartile

521 range for the box whiskers.

522 *Supplementary Material*

523

524 *Supplemental Tables and Figures:*

525 *Table S1. Full dataset used in analyses (to be provided with the published version).*

526 *Table S2. AIC-selected model for total citations, primary research papers only.*

527 *Table S3. AIC-selected model for self citations, primary research papers only.*

528 *Table S4. Pearson correlations among scorers for title humour.*

529 *Figure S1. Associations with total citation rates (top row) and self citation (bottom row) for two-*

530 *part titles (“colon”), question titles, assertive-sentence titles, and titles including names*

531 *of political regions.*

532 *Figure S2. Title length and rates of total (A) and self (B) citation.*
